1 Genetic mapping in Diversity Outbred mice identifies a *Trpa1* variant influencing late phase  
2 formalin response

3  
4 Jill M. Recla, Ph.D. 1,2

5 Jason A. Bubier, Ph.D. 1

6 Daniel M. Gatti, Ph.D. 1

7 Jennifer L. Ryan, B.S. 1

8 Katie H. Long, B.S. 1

9 Raymond F. Robledo, Ph.D. 1

10 Nicole Glidden, B.A. 3

11 Guoqiang Hou, Ph.D. 1

12 Gary A. Churchill, Ph.D. 1

13 Richard S. Maser, Ph.D. 1

14 Zhong-wei Zhang, Ph.D. 1

15 Erin E. Young, Ph.D. 4,3,5

16 Elissa J. Chesler, Ph.D. 1

17 Carol J. Bult, Ph.D. 1

18  
19 1 The Jackson Laboratory

20 600 Main Street, Bar Harbor, ME 04609, USA

21  
22 2 IGERT Program in Functional Genomics

23 Graduate School of Biomedical Sciences and Engineering

24 The University of Maine

25 Orono, ME 04469, USA

26  
27 3 Department of Genetics and Genome Sciences

28 UCONN Health

29 400 Farmington Avenue

30 Farmington, CT 06030-6403, USA

31

32 4 School of Nursing  
33 University of Connecticut  
34 231 Glenbrook Rd, Unit 4026  
35 Storrs, CT 06269-4026, USA

36  
37 5 Institute for Systems Genomics  
38 University of Connecticut  
39 Storrs, CT 06269-4026, USA

40  
41 Number of Pages: 37  
42 Number of Figures: 8  
43 Number of Tables: 4

44  
45 Corresponding Author: Jill M. Recla  
46 600 Main Street, Bar Harbor, ME 04609, USA  
47 (tel) 207-288-6408  
48 (email) [jill.recla@jax.org](mailto:jill.recla@jax.org)  
49 fax not available

50  
51 **RUNNING TITLE:** Genetic mapping in DO mice identifies *Trpa1* functional variant

52  
53 **KEY WORDS:** pain genetics, formalin, chronic pain, chemical nociception, Diversity Outbred  
54 mice, genetic linkage mapping  
55

56 **ABSTRACT**

57 Identification of genetic variants that influence susceptibility to chronic pain is key to  
58 identifying molecular mechanisms and targets for effective and safe therapeutic alternatives to  
59 opioids. To identify genes and variants associated with chronic pain, we measured late phase  
60 response to formalin injection in 275 male and female Diversity Outbred (DO) mice genotyped  
61 for over 70 thousand SNPs. One quantitative trait locus (QTL) reached genome-wide  
62 significance on chromosome 1 with a support interval of 3.1 Mb. This locus, *Nociq4* (nociceptive  
63 sensitivity inflammatory QTL 4; MGI:5661503), harbors the well-known pain gene *Trpa1*  
64 (transient receptor potential cation channel, subfamily A, member 1). *Trpa1* is a cation channel  
65 known to play an important role in acute and chronic pain in both humans and mice. Analysis of  
66 DO founder strain allele effects revealed a significant effect of the CAST/EiJ allele at *Trpa1*,  
67 with CAST/EiJ carrier mice showing an early, but not late, response to formalin relative to  
68 carriers of the seven other inbred founder alleles (A/J, C57BL/6J, 129S1/SvImJ, NOD/ShiLtJ,  
69 NZO/HILtJ, PWK/PhJ, and WSB/EiJ). We characterized possible functional consequences of  
70 sequence variants in *Trpa1* by assessing channel conductance, *Trpa1/Trpv1* interactions, and  
71 isoform expression. The phenotypic differences observed in CAST/EiJ relative to C57BL/6J  
72 carriers were best explained by *Trpa1* isoform expression differences, implicating a splice  
73 junction variant as the causal functional variant. This study demonstrates the utility of advanced,  
74 high-precision genetic mapping populations in resolving specific molecular mechanisms of  
75 variation in pain sensitivity.

76

77 **INTRODUCTION**

78           Chronic pain is a maladaptive condition in which the sensation of pain persists in the  
79 absence of an eliciting stimulus. It is estimated to affect up to 30% of the world's population [26].  
80 With a reported trait heritability of 16-50% in humans [34; 60], the onset and continuation of  
81 chronic pain is influenced heavily by genetic background. Pain-related genetic variants  
82 identified to date influence variation in neurotransmitters and their receptors, growth factors,  
83 inflammatory cytokines, and myriad other neuromodulators [28; 88]. Although several highly-  
84 penetrant human genetic variants are known to underlie rare familial monogenic pain conditions  
85 [28; 43; 65; 68; 84; 89], the genetic landscape of common chronic pain conditions suggests  
86 minor contributions from a large number of single nucleotide polymorphisms (SNPs)  
87 representing diverse functional pathways [88; 89].

88           The laboratory mouse has proven to be a useful discovery platform for the genetic study  
89 of human chronic pain; findings from several mouse studies have been corroborated in humans  
90 [54-56; 61; 67; 77]. Low allelic variation, genetic recombination density and resulting lack of  
91 mapping precision, however, limit the utility of conventional mapping strategies using the  
92 laboratory mouse for discovery of new genes and variants related to pain phenotypes. The  
93 Diversity Outbred (DO) stock [21] is a mouse population derived from a set of eight genetically  
94 diverse parental strains (A/J, C57BL/6J, 129S1/SvImJ, NOD/ShiLtJ, NZO/HILtJ, CAST/EiJ,  
95 PWK/PhJ, and WSB/EiJ) that has increased heterozygosity and allelic diversity compared to  
96 conventional mapping populations. DO mice are produced by the repeated random outcrossing  
97 of non-siblings originally from the Oak Ridge National Laboratory (ORNL) Collaborative Cross  
98 (CC) colony [20], a genetically defined panel of recombinant inbred lines. The DO mouse  
99 population captures a large set of natural allelic variants derived from a common set of eight

100 founder strains, providing multitudinous combinations of segregating alleles in virtually all  
101 genetic loci in the mouse genome [76]. The high genetic diversity and precision afforded by the  
102 DO makes it an ideal resource for tractable identification of novel genes and variants governing  
103 chronic pain. We published the first application of DO mice and genetic linkage mapping to the  
104 study of pain genetics in 2014 [66], where we identified a novel role for a single, protein-coding  
105 candidate pain gene, *Hydin* (HYDIN, axonemal central pair apparatus protein; MGI:2389007),  
106 postulated to influence thermal pain response via a previously unreported ciliary mechanism in  
107 the choroid plexus–cerebrospinal fluid system.

108         Here, we build upon our previous work by examining a chronic pain model, the late  
109 phase response to formalin injection. We used updated statistical algorithms for genetic linkage  
110 mapping and SNP association mapping in CC and DO mice [76] to map genetic loci involved in  
111 early and late phase formalin response, and identify precise allelic variants in the DO population  
112 that could be responsible for variation in pain response. We then experimentally evaluated the  
113 causal mechanisms attributable to specific variants in the QTL to determine which was  
114 responsible for variation in the pain response.

## 115 **MATERIALS AND METHODS**

### 116 *Diversity Outbred Mice*

117         Male and female DO mice (n =300; J:DO, JAX stock number 009376) from generation 8  
118 (G8) of outcrossing were obtained from The Jackson Laboratory at 11 weeks of age. Mice were  
119 transferred from the breeding facility directly to an adjoining housing facility via wheeled cart  
120 and were acclimated to the vivarium for at least 2 weeks prior to testing at 13–17 weeks of age.  
121 Mice were housed in duplex polycarbonate cages with a Shepherd Shack® on ventilated racks  
122 providing 99.997% HEPA filtered air to each cage in a climate-controlled room under a standard

123 12:12 light–dark cycle (lights on at 0600 h). Pine cob bedding was changed weekly and mice  
124 were provided ad-libitum access to food (NIH31 5K52 chow, LabDiet/PMI Nutrition, St. Louis,  
125 MO, USA) and acidified water. Female mice were group-housed with a cage density of 4-5  
126 individuals per cage. Male mice were single housed, as earlier studies indicate a propensity  
127 toward aggressive behavior in group-housed DO males [47; 66]. All procedures and protocols  
128 were approved by The Jackson Laboratory Animal Care and Use Committee (Bult AUS #01011)  
129 and were conducted in compliance with the National Institutes of Health Guidelines for the Care  
130 and Use of Laboratory Animals.

### 131 *Experimental Design*

132 A total of 288, 13-17 week old DO mice (147 female, 141 male) were phenotyped using  
133 the formalin assay of nociception. Twelve of the original 300 mice were excluded from analysis  
134 due to bite wounds or congenital abnormalities, including hind leg splay and cranial  
135 malformation. Mice were randomly assigned to testing groups, such that an equal number of  
136 male and female mice were tested each day ( $n = \sim 16$  per sex). Two groups were tested per day  
137 during the animals' resting phase. The morning group tested between 09:00 and 10:00 h, the  
138 afternoon group between 11:00 and 12:00 h. A single experimenter performed all of the  
139 injections, and the testing room was vacated for the duration of the assay.

140

### 141 *Formalin Assay of Nociception*

142 Mice were transported to the testing room (maintained at 24-25°C) and left undisturbed  
143 in their polycarbonate cages to habituate for 1 hour under ambient light before beginning the  
144 experiment. Twenty microliters of 2.5% formalin solution was injected subcutaneously into the  
145 plantar surface of the left hind paw using a 0.3 cc micro-syringe (Hamilton) with a 30-gauge

146 needle. Injected mice were individually placed into 4-quadrant plastic observation chambers  
147 (4”w x 4”l x 5”h), located on a flat, glass surface to allow clear observation of the injected paw.  
148 Administration of 2.5% formalin was sufficient to produce the desired biphasic response while  
149 increasing test sensitivity and reducing animal suffering compared to the most commonly used 5%  
150 formalin solution.

151 Noldus Observer 2.1 (Noldus Information Technology, Wageningen, The Netherlands)  
152 was used to record video with one camera per observation chamber mounted below the glass  
153 surface. We recorded the time spent licking or biting the formalin-injected paw in 1-min  
154 intervals up to 60 min beginning immediately after formalin injection after the time sampling  
155 method [2]. Stationary video cameras were used to record the behavioral responses. Video  
156 observations were binned into 60 sec time points and scored manually by a single trained  
157 investigator. A time point was assigned a score of 1 if the mouse was observed licking or biting  
158 the injected paw, 0 otherwise. Scores were summed across time points for the acute (0-10 mins)  
159 and chronic (11-60 mins) response phases, giving each mouse an acute pain score of 0-10 and a  
160 total chronic pain response score of 0-50. Longer time spent licking or biting the injected paw  
161 during the late response phase was taken to imply increased susceptibility to chronic pain.

## 162 *Genotyping*

163 Genotyping was performed on all 288 DO samples. DNA was prepared from tail tips and  
164 genotyped using the second generation Mouse Universal Genotyping Array (MegaMUGA)  
165 performed by the GeneSeek service (<http://www.neogen.com/GeneSeek; Lincoln, NE, USA>).  
166 Built on the Illumina Infinium platform (San Diego, CA, USA), the MegaMUGA contains 77.8K  
167 SNP markers distributed throughout the mouse genome with an average spacing of 33 Kb [23;  
168 81]. SNPs were selected to be representative of the diversity in the founding strains of the CC

169 and DO – A/J, C57BL/6J, 129S1/SvImJ, NOD/ShiLtJ, NZO/HILtJ, CAST/EiJ, PWK/PhJ, and  
170 WSB/EiJ [58].

### 171 *QTL mapping*

172 QTL mapping was performed in 275 DO mice (147 female, 128 male). Of the 288  
173 phenotyped animals, three mice were excluded due to missing genotype calls and ten were  
174 excluded due to video recording error. Mapping was carried out as described by Gatti et al. [29].  
175 All phenotype and genotype data have been made publicly available through the QTL archive at  
176 the Mouse Phenome Database under study name Recla2 (MPD, <http://phenome.jax.org/>) [16].

### 177 **Additive haplotype model**

178 The additive model assumes that each copy of the founder alleles contributes a unit of  
179 trait variation; there are no dominance effects in this model. Founder haplotypes were  
180 reconstructed using a Hidden Markov Model (HMM) that produced a matrix of 36 genotype  
181 probabilities for each sample at each SNP. Genotype probabilities at each SNP were then  
182 collapsed to an eight-state allele dosage matrix by summing the probabilities contributed by each  
183 founder. Phenotypic data were normalized by square root transformation of total chronic pain  
184 response score prior to linkage mapping analysis to satisfy model assumptions. Mapping was  
185 performed using QTLRel software (<http://www.palmerlab.org/software>) [19]. A mixed model  
186 was fit with sex and AM/PM group as additive covariates and a random effect was included to  
187 account for kinship. Regression coefficients for additive effects of founder haplotypes were  
188 estimated at each genomic location. Significance thresholds were obtained by performing 1000  
189 permutations of the genome scans with phenotype data being shuffled among individuals and 2-  
190 LOD support intervals from the linear model were determined for significant ( $p \leq 0.05$ ),  
191 suggestive ( $p \leq 0.10$ ), and trending ( $p \leq 0.63$ ) QTL peaks.



192 **Additive SNP model**

193           The SNP-based additive model is widely used in human association mapping [17].  
194 Mapping at the two-state SNP level increases power and precision by assessing the effects at  
195 individual variants, and has the potential benefit for evaluating dominance effects with one  
196 additional degree of freedom [29]. To implement the additive SNP model, we computed a  
197 probabilistic imputation of the genotype at every known SNP locus genome-wide. We then fit  
198 an additive SNP model by regressing the square root of the total chronic pain response score on  
199 the imputed DO genotypes. Mapping was performed using QTLRel software  
200 (<http://www.palmerlab.org/software>) [19]. To gain computational efficiency, we assigned the  
201 diplotype state probability between each adjacent pair of genotyped markers to the average of the  
202 flanking diplotype state probabilities. Any sets of SNPs in the interval with identical strain  
203 distribution patterns among the eight founders were assigned identical values and we computed  
204 the regression once for each set of identical SNPs in an interval. Significant SNPs were  
205 determined to lie within a 1-LOD support interval from the maximum LOD.

206 *Candidate gene analysis*

207           To assess the plausibility of candidate genes in the *Nociq4* region we compiled functional,  
208 phenotypic, and expression annotations from a variety of databases (Supplemental Table S1)  
209 using methods for candidate gene prioritization we developed previously [66]. First, we  
210 identified all protein-coding and functional RNA genes within the *Nociq4* region  
211 (chr1:11.95..15.07 Mb) using the unified mouse gene catalog from the Mouse Genome  
212 Informatics (MGI) database (<http://www.informatics.jax.org/marker/>) [15]. Second, for each  
213 genome feature in the region, we compiled functional, phenotypic, and expression annotations  
214 from the informatics resources in Table S1 as follows: gene expression annotations were

215 collected from the Allen Brain Atlas (ABA) [46], EBI Expression Atlas (EEA) [63], Gene  
216 Expression Omnibus (GEO) [10], and the Gene eXpression Database (GXD) [71] through MGI  
217 [15]; functional InterPro protein domain [27], Mammalian Phenotype (MP) [70], and Gene  
218 Ontology (GO) annotations [6; 78] were obtained through MGI; pain-related phenotype data  
219 from pain gene knock-out models were collected from MGI and PainGenesdb [42]. Finally, SNP  
220 locations from the Sanger Mouse Genomes Project version 5 (REL-1505) [37] were used to  
221 identify SNPs in the additive SNP model significantly associated with *Nociq4*. Gene annotations  
222 from Ensembl annotation version 75 [85] were used to computationally plot the candidate genes  
223 underlying each SNP.

224 To identify plausible genetic and functional candidate genes in a computationally  
225 predictive manner, sets of genes were created in GeneWeaver [7] using the MGI and Ensembl  
226 gene lists generated above. The GeneSet Graph tool was used to intersect the genes in the QTL  
227 interval with those that have SNPs specific to the CAST/EiJ strain. In addition, we intersected a  
228 set of genes derived from RNA-Seq data (GEO GSM2743739) to identify genes that are  
229 expressed in the dorsal root ganglia (DRG). Finally, we interested a set of 889 mouse genes  
230 associated with the Mammalian Phenotype Ontology term (MP:0002067) “abnormal sensorial  
231 capabilities/reflexes/nociception.” The resulting GeneSet graph produced by GeneWeaver  
232 predicts the most likely candidate gene given the conditions described above.

### 233 *Phenotypic contributions of DO founder strains*

234 We examined the relationship between allelic variation and phenotypic response at  
235 *Nociq4* by first computationally sorting the original DO mapping population into groups based  
236 on the parental allele at the *Nociq4* peak (Chr1:14.25 Mb; n=8, 1 group per DO founder strain).  
237 We then calculated the mean allelic response for each DO founder strain by averaging the pain

238 response scores per group at each 1 min time point over the 60 min formalin testing period.

239 Results were calculated and plotted over time in R software environment 3.0.2.

#### 240 *Trpa1* SNP analysis

241 A major benefit of the DO in mapping studies is the ability to precisely associate  
242 observable phenotypic variation with specific underlying genetic variants. We identified putative  
243 causal variants unique to CAST/EiJ in *Trpa1* by examining the imputed DO genotype data used  
244 to fit the additive SNP model at *Nociq4*. We selected SNPs with LOD scores greater than the  
245 maximum LOD score (5.71) minus one and intersected them with the exons and untranslated  
246 regions of *Trpa1*, obtained and processed computationally from NCBI dbSNP Build 150 [1; 69].  
247 We further subset these SNPs by selecting missense, splice site, or other regulatory variants  
248 likely to produce a functional consequence (Sanger Mouse Genomes Project version 5; REL-  
249 1505 [37]).

250

#### 251 *Electrophysiological evaluation of ankyrin domain variant*

252 CAST/EiJ variant rs32035600 induces a Valine to Isoleucine codon shift (Val115Ile) in  
253 the *Trpa1* ankyrin repeat domain (ARD), a region of the folded protein known to influence the  
254 electrophysiological properties of the channel [32; 44; 83], and which is involved in the  
255 aggregation of *Trpa1* and *Trpv1* receptors. We evaluated the electrophysiological consequence  
256 of CAST/EiJ variant rs32035600 on *Trpa1* channel conductance using whole-cell patch clamp  
257 recording in HEK293T cells.

#### 258 *Cell line mutation*

259 We obtained clone EX-Mm17807-M03 (Genecopoeia) for *Trpa1* ORF driven by a CMV  
260 promoter and a C-terminal GFP tag. Using site directed mutagenesis in *E.coli*, mouse SNP

261 rs32035600 was mutated from the C57BL/6J (G) to the CAST/EiJ (A) variant. Both variants  
262 were transfected into human embryonic kidney cells (HEK293T cells). HEK293T cells were  
263 grown under standard conditions in DMEM with 10% FBS, Glutamax, and  
264 penicillin/streptomycin, and were transfected with expression plasmids encoding GFP-tagged  
265 *Trpa1* carrying the two variants of interest. Cells were transfected using 500 ng of plasmid DNA  
266 and 1.5 ul of Lipofectamine 3000 transfection reagent, according to the manufacturer's protocols.

### 267 *Patch-clamp analysis*

268 Forty-eight to 72 h after transfection, HEK293T cells grown on glass coverslips were transferred  
269 to a submersion chamber where they were continuously perfused with extracellular recording  
270 solution containing (in mM): 124 NaCl, 3.0 KCl, 1.5 CaCl<sub>2</sub>, 1.3 MgCl<sub>2</sub>, 1.0 NaH<sub>2</sub>PO<sub>4</sub>, 26  
271 NaHCO<sub>3</sub>, and 20 glucose, saturated with 95% O<sub>2</sub> and 5% CO<sub>2</sub> at room temperature (21-23 °C).  
272 Cells were viewed with a 40x objective (N.A. 0.8, water immersion) and transfected cells were  
273 identified using GFP epifluorescence. Whole-cell patch clamp recordings were performed with a  
274 Multiclamp 700B amplifier (Molecular Devices, Sunnyvale, CA). The pipette solution contained  
275 (in mM): 130 CsCl, 4 ATP-Mg, 0.3 GTP-Na, 0.5 EGTA, and 10 HEPES (pH 7.2, 270-280  
276 mOsm with sucrose). The series resistance, usually between 7-12 MΩ, was continuously  
277 monitored but not compensated. Data were discarded when series resistance changed by more  
278 than 25% during the experiment. Mustard oil (allyl isothiocyanate, Sigma-Aldrich, #377430)  
279 was diluted in the extracellular solution to the concentration of 200 μM and applied through a  
280 buffer pipette placed 40-50 μm away from the recorded cell. The buffer pipette had a tip  
281 diameter of 2 μm and the pressure pulses were 10 s long at 20 psi. Experiments were conducted  
282 using AxoGraph X (AxoGraph Scientific, Sydney, Australia). Data were filtered at 2 kHz and  
283 digitized at 8 kHz. Data analysis was performed using AxoGraph X.

284

285 *Evaluation of ankyrin binding interactions by Co-Immuno-Precipitation of Trpa1-Trpv1*

286       The Val115Ile codon shift induced by CAST/EiJ variant rs32035600 may affect the  
287 ability of *Trpa1* to bind and co-localize with its functional partner *Trpv1* (MGI:1341787;  
288 transient receptor potential cation channel, subfamily V, member 1) [72]. To test this, we  
289 performed Co-Immuno-Precipitation of the *Trpa1-Trpv1* complex in mouse DRG from male and  
290 female formalin and saline treated CAST/EiJ and C57BL/6J mice. Tissue extracts were prepared  
291 using Lysis Buffer with Protease Inhibitors (LBPI; 300  $\mu$ L/sample). Samples were then  
292 homogenized with a mortar/pestle, incubated at 4°C with gentle agitation for one hour followed  
293 by centrifugation (Eppendorf 5417C) at 20000 x g for 20 minutes at 4°C to remove cell debris.  
294 The supernatant/tissue extract was then transferred to a fresh microcentrifuge tube. *Trpv1*  
295 antibody (1  $\mu$ g total; Abcam, Cat#ab6166) was added to each normalized cell lysate sample  
296 (100 $\mu$ g/ $\mu$ L). Fresh LBPI was added to each sample to reach a final volume of 500  $\mu$ L. Samples  
297 and antibody incubated overnight at 4°C with gentle agitation. Protein A/G Sepharose bead  
298 slurry (75  $\mu$ L/sample; Santa Cruz Cat# sc-2003) was added to each tube for overnight incubation  
299 at 4°C with gentle agitation. Agarose beads were collected by (8000 x g) centrifugation and were  
300 washed (x3) with 1 mL 1X Wash Buffer. 2X SDS/PAGE loading buffer (30  $\mu$ L) was added to  
301 the beads and samples were boiled for 5 minutes to elute the complex. Eluent was loaded directly  
302 into single wells in a 4-15% acrylamide gel (Bio-Rad) and run for 44 minutes at 200 volts  
303 followed by transfer to a nitrocellulose membrane for 1 hour at 100 volts. The nitrocellulose blot  
304 was probed for the presence of *Trpa1* (EMD Millipore, Cat# ABN1009; 1:1000) and  $\beta$ -actin  
305 (Actin Novus Biologicals, Cat# NBP254690; 1:5000). The blot was also probed for the presence  
306 of *Trpv1* (Alomone Labs, Cat# ACC-030; 1:1000) and  $\beta$ -actin (Actin Novus Biologicals, Cat#

307 NBP254690; 1:5000). ImageJ (U. S. National Institutes of Health, Bethesda, MD, USA) was  
308 used to quantify the band intensities. This experiment was replicated a second time. In each  
309 replicate the ratio of  $\beta$ -actin-normalized *Trpa1*/*Trpv1* was obtained per sample.

310 *qRT-PCR expression analysis of Trpa1*

311 CAST/EiJ SNP rs239908314 is a predicted splice region variant located in *Trpa1* intron  
312 21. Exon 20 is skipped in mouse splice variant *Trpa1b*, implicating rs239908314 in *Trpa1*  
313 isoform transcript control. The full-length *Trpa1* transcript, designated *Trpa1a*, interacts  
314 physically with *Trpa1b* to enhance *Trpa1a* expression on the plasma membrane, significantly  
315 increasing *Trpa1* agonist responses [86]. We explored *Trpa1* isoform transcript expression in  
316 DRG from pain-sensitive (C57BL/6J; n=7, 3 male) and pain-resistant (CAST/EiJ; n=8, 4 male)  
317 mice. DRG were dissected and stored in RNAlater. RNA was extracted using TRIzol reagent,  
318 quality assessed using Agilent Bioanalyzer Nano Chips. 200ng total RNA was converted to  
319 cDNA using random-decamers. TaqMan assays were used to measure abundance of *Trpa1* exon  
320 13-14 (TaqMan Assay ID Mm00625257\_ml) common to *Trpa1a* and *Trpa1b* and exons 19-20  
321 (Mm01227443\_ml) and exons 20-21 (Mm00625257\_ml) both specific for *Trpa1a*. The  
322 threshold cycle (Ct) for each probe was determined using the ViiA 7 software (Thermo Fisher  
323 Scientific, Waltham, MA, USA). The data were further analyzed using the  $\Delta\Delta C_t$  method,  
324 normalized to *Gapdh* (Mm99999915\_g1), and plotted in Fig 8. qRT-PCR data are archived in  
325 MPD (<http://phenome.jax.org/>) [16].

326 **Results**

327 *Genetic Linkage Mapping and SNP Association Mapping Identify a Single QTL Peak on*

328 *Chromosome 1*

329 Genetic linkage mapping and SNP association mapping identified one single QTL peak  
330 of genome-wide significance for late phase response to formalin injection located on  
331 chromosome 1, which we have named nociceptive sensitivity inflammatory QTL 4 (*Nociq4*;  
332 MGI:5661503) (Figure 1A). This locus has not been previously detected in mouse genetic  
333 mapping studies. An approximate confidence interval for *Nociq4* was calculated using a 1-LOD  
334 drop from the peak SNP association, resulting in an interval width of 3.1 Mbp (proximal:  
335 rs246258668 [11.95 Mb]; distal: rs580950795 [15.07 Mb]). The maximum LOD (logarithm of  
336 odds) score for *Nociq4* is 5.71 and occurs over several SNPs, ranging from 14.26 – 14.33 Mb,  
337 giving a peak location of 14.29 Mb (GRCm38).

338

339 *Candidate gene analysis*

340 The *Nociq4* locus contains putatively 43 candidate genes: 11 protein-coding, 20 non-  
341 coding RNA, and 12 unclassified (GRCm38; MGI Genes and Markers query performed May  
342 2018, Feature Type “gene” [87]). Annotations obtained from Ensembl annotation version 75 [85]  
343 produced similar results (Figure 2C). Rigorous de novo genetic or experimental evaluation of  
344 each candidate gene is inefficient and costly, so we compiled existing functional, phenotypic,  
345 and expression annotations for each gene to identify candidates with high relevance to pain based  
346 on known experimental evidence (Supplemental Table S2).

347 At the time of this writing (June 2018), 16 of the 43 *Nociq4* candidate genes had no  
348 biological annotations or related functional data. All remaining candidates (27) had at least one

349 annotated expression study reporting positive transcript identification in central nervous system  
350 (CNS), peripheral nervous system (PNS), or skeletal muscle tissue. Of these, only 6 had  
351 additional functional or phenotypic annotations related to nociceptive or other nervous system  
352 abnormalities: *A830018L16Rik*, *Prdm14*, *Ncoa2*, *Eya1*, *Msc*, and *Trpa1*. Annotations related to  
353 altered nociception and neuron responses point to *Trpa1* (transient receptor potential cation  
354 channel, subfamily A, member 1; MGI:3522699) as the most likely candidate gene in the region.  
355 The GeneWeaver GeneSet graph in Figure 3 corroborates these results, identifying *Trpa1* as the  
356 highest-ranking candidate gene in the *Nociq4* interval meeting both genetic and functional  
357 criteria [8].

358 *Trpa1* is found in the plasma membranes of pain-detecting sensory nerves [64]. Gated by  
359 electrophilic compounds such as formalin, *Trpa1* is known to signal cell membrane deformation  
360 as well as noxious chemicals and temperatures [44]. Human TRPA1 is involved in inflammatory  
361 and neuropathic pain [57], and a point mutation at TRPA1 N855S is responsible for familial  
362 episodic pain syndrome [39]. Because of its capacity to respond to a wide variety of chemical  
363 compounds, *Trpa1* is considered critical for noxious chemical sensation, inflammatory signaling,  
364 and physiological and pathophysiological pain sensation [50]. It triggers beneficial avoidance  
365 behaviors and promotes longer-lasting biological responses such as inflammation, rendering it an  
366 attractive target for the treatment of both acute and chronic pain [18; 22].

367 *CAST/EiJ alleles contribute to diminished late phase response at Nociq4*

368 Mice harboring *CAST/EiJ* alleles at *Nociq4* show a diminished late phase response to  
369 formalin (Figure 1B). Examination of the summed phenotypic scores of mice averaged over  
370 time within each haplotype carrier group (n=8) at the *Nociq4* peak (Chr1:14.25 Mb) reveals a  
371 unique behavioral response by mice harboring the *CAST/EiJ* allele at *Nociq4* – they do not



372 appear to exhibit a late phase response to formalin injection despite an intact early phase  
373 response (Figure 4). Formalin injection typically induces a biphasic response in rodents, with  
374 behavioral plots showing two distinct peaks marking the onset, maintenance, and ending of acute  
375 and chronic pain states (0-10 mins and 10-60 mins, respectively). Most strains show the classic  
376 biphasic response curve, with early and late phase behavioral response peaks clearly visible (4A  
377 and 4C, respectively). During the early response phase (4A), mice exhibit an acute pain response  
378 regardless of DO founder haplotype at *Nociq4*. Mice harboring CAST/EiJ alleles at *Nociq4* do  
379 not appear to exhibit a late phase formalin response at 4C.

#### 380 *Trpa1* SNP Analysis

381 To more precisely identify the basis of the allelic affect pattern at *Nociq4* of a decreased  
382 late-phase response in mice harboring the CAST/EiJ allele at the locus, we used SNP data from  
383 NCBI dbSNP Build 150 [1; 69] and the Sanger Mouse Genomes Project version 5 (REL-1505)  
384 [37] to identify putative causal *Trpa1* variants unique to CAST/EiJ. Of the 201 SNPs identified,  
385 190 are located in introns and have no known or predicted functional consequence  
386 (Supplemental Table S3). Eight of the remaining 11 SNPs are synonymous coding exon variants.  
387 The three remaining SNPs have consequences likely to influence the function or expression of  
388 *Trpa1*: missense variant rs32035600 (Val115Ile; exon 3), 3' UTR variant rs215479411, and  
389 splice region variant rs239908314 (intron 21) (Table 1).

390 Missense variant rs32035600 is located in the ankyrin (ANK) binding domain of *Trpa1*  
391 [30]. The *Trpa1* ANK binding domain is involved in the recognition of electrophilic compounds  
392 [33; 48] and calcium [25], which could imply variant effects on the channel's sensing and gating  
393 functions. ANK binding domain mutations could also influence *Trpa1* regulation by modifying  
394 the channel's ability to colocalize with its functional partner *Trpv1* [82]. 3' UTR variant

395 rs215479411 is most likely to affect *Trpa1* expression levels through mechanisms of post-  
396 transcriptional modification, such as binding and degradation by micro- or other non-coding  
397 RNAs [62]. The splice region variant (rs239908314) is located in *Trpa1* intron 21 and may  
398 regulate the expression of transcript isoforms *Trpa1a* (full-length) and *Trpa1b* (lacking exon 20).  
399 [86]. We functionally characterized missense variant rs32035600, 3' UTR variant rs215479411,  
400 and splice region variant rs239908314 for causal impacts on *Trpa1* by measuring changes in  
401 channel electrophysiology, receptor binding affinity/colocalization with *Trpv1*, and transcript  
402 isoform expression levels. The workflow behind our functional experimental protocol is  
403 summarized in Figure 5.

404

#### 405 *Electrophysiology*

406 Val115Ile encodes part of the *Trpa1* ankyrin (ANK) 2 binding domain (IPR002110),  
407 which is part of a larger chain of ANK repeats known as the ankyrin repeat domain (ARD). The  
408 *Trpa1* ARD facilitates cytoplasmic *Trpa1* inter-subunit interactions that may regulate channel  
409 assembly and/or facilitate conformational changes after co-factor binding or agonist-evoked  
410 gating [46]. Isoleucine is slightly more hydrophobic than Valine [52], suggesting rs32035600  
411 may impact steric linking of the ANK repeat network structure. Our null hypothesis was that  
412 CAST/EiJ variant rs32035600 would have no effect on *Trpa1* channel gating and conductance  
413 compared to the C57BL/6J allele. We used whole-cell patch clamp recording to explore the  
414 electrophysiological consequence of CAST/EiJ rs32035600 on *Trpa1* function. HEK293T cells  
415 expressing the C57BL/6J and CAST/EiJ variants of *Trpa1* rs32035600 both showed robust  
416 responses to the application of mustard oil (MO) (Figure 6). There was no difference in current  
417 amplitude between C57BL/6J and CAST/EiJ *Trpa1*, or in the rise or decay time of MO-induced

418 currents, suggesting that rs32035600 does not affect the gating and conductance of *Trpa1*. We  
419 note that the electrophysiological properties of the channel were investigated under a limited set  
420 of conditions, and therefore we cannot completely rule out an effect of the variant on channel  
421 properties.

422

#### 423 *Co-Immuno-Precipitation of Trpa1 and Trpv1*

424 *Trpa1* and *Trpv1*, two ligand-gated non-selective cation channels, are known to be co-  
425 expressed in DRG [45], with a *Trpa1-Trpv1* interaction thought to be an important regulatory  
426 mechanism of persistent pain [82]. To determine if the amino acid changes resulting from the  
427 C57BL/6J / CAST/EiJ SNP (C:T; rs32035600) affect this interaction, protein extracts from the  
428 DRG of C57BL/6J and CAST/EiJ mice 30 minutes after formalin or saline injection were  
429 incubated with antibodies against *Trpv1*. The protein antibody complex was precipitated and  
430 subject to western blot analysis with antibodies against *Trpa1*. Quantification of blot intensity of  
431 *Trpa1/v1* ratios in both replicates revealed evidence of a sex by genotype effect such that the  
432 CAST/EiJ males have a heightened response to formalin that results in increased receptor co-IP  
433 and C57BL/6J females decrease receptor co-IP in response at 30 mins post formalin injection  
434 (Figure 7). Although interesting as a possible mechanism of sex x genotype interactions in pain  
435 sensitivity, this result does not explain the consistent effect of the CAST/EiJ allele on overall late  
436 phase response. Therefore, rs32035600 is unlikely to be responsible for variation in the formalin  
437 response through alteration of the *Trpa1-Trpv1* coupling.

438

#### 439 *Evaluation of expression regulatory variation*

440 *Trpa1* has been shown to exist in mouse DRG in two isoforms: *Trpa1a* and *Trpa1b*.  
441 *Trpa1a*, the full-length transcript, is functionally conserved among mouse, rat, and human. The  
442 splice variant isoform, *Trpa1b*, lacks the transmembrane region encoded by exon 20 and appears  
443 to be non-functional as an ion channel. *Trpa1b* is known to physically interact with *Trpa1a*,  
444 enhancing the expression of *Trpa1a* on the cell's plasma membrane. *Trpa1b* has been shown to  
445 regulate *Trpa1a* during the late stages of partial sciatic nerve ligation (PSL)-induced neuropathic  
446 pain and complete Freund's adjuvant (CFA)-induced inflammatory pain [86].

447 The CAST/EiJ-specific SNP rs239908314 may regulate *Trpa1* alternative splicing by  
448 functioning as a splice region variant in *Trpa1* intron 21. We used qRT-PCR to explore the  
449 allelic effect of rs239908314 on *Trpa1* isoform abundance by quantifying *Trpa1a* and *Trpa1b*  
450 transcript levels in DRG from untreated CAST/EiJ (pain-resistant) and C57BL/6J (control) mice.  
451 Results show total *Trpa1* expression is approximately doubled in CAST/EiJ mice compared to  
452 age- and sex-matched C57BL/6J controls (Figure 8). When both *Trpa1a* and *Trpa1b* isoforms  
453 are considered, only *Trpa1a* is differentially expressed between the strains, expressed nearly  
454 three times higher in CAST/EiJ DRG. Our results indicate no difference in *Trpa1b* transcript  
455 abundance between CAST/EiJ versus C57BL/6J mice, which is consistent with work by Zhou et  
456 al. [86]. Our null hypothesis was that there was no difference in isoform expression levels in  
457 DRG from both untreated strains. We found instead a significant up-regulation of *Trpa1a* in  
458 CAST/EiJ mice, and a significant difference in isoform ratio between CAST/EiJ and C57BL/6J,  
459 with *Trpa1a* expressed nearly three times higher in CAST/EiJ DRG. If the differential  
460 abundance were a result of the 3' UTR SNP (rs215479411, common to both *Trpa1a* and *Trpa1b*),  
461 the effect on post-transcriptional modifications would be expected to be the same in both  
462 isoforms, not just in the abundance of *Trpa1a* as observed. Our findings suggest a functional

463 role for SNP rs239908314 in *Trpa1* isoform regulation, and a possible mechanism by which  
464 CAST/EiJ mice regulate their late phase response to formalin injection.

## 465 **Discussion**

466 Using genetic linkage mapping and genome wide SNP association mapping in a cohort of  
467 275 DO mice, we identified a novel 3.1 Mbp late phase formalin response QTL, *Nociq4*  
468 (nociceptive sensitivity inflammatory QTL 4; MGI:5661503), on mouse chromosome 1  
469 harboring 31 candidate genes. *Nociq4* harbors the well-known pain gene *Trpa1* (transient  
470 receptor potential cation channel, subfamily A, member 1), a cation channel governing acute and  
471 chronic pain in both humans and mice [4; 13; 38; 40; 41; 51].

472 We identified *Trpa1* as the most plausible candidate gene in the QTL region, noting a  
473 diminished late phase formalin response in mice harboring the CAST/EiJ allele at the locus. We  
474 characterized functional consequences of sequence variants in *Trpa1*: a missense variant  
475 resulting in a nonsynonymous amino acid change (rs32035600; Val115Ile) which could affect  
476 either electrophysiology or receptor colocalization, a 3' UTR variant (rs215479411) which could  
477 affect overall transcript abundance, and a splice junction variant (rs239908314) which could  
478 affect transcript isoform expression. qRT-PCR analysis confirmed a three-fold expression  
479 difference in *Trpa1a* isoform abundance in untreated CAST/EiJ compared to C57BL/6J DRG,  
480 implicating *Trpa1* alternative splicing in diminished late phase formalin response.

481 Experimental evidence in rodents has shown that tonic (persistent) pain, similar to the  
482 chronic pain experienced by humans, is modulated by different CNS mechanisms than acute pain  
483 [79]. The first phase of the formalin test (0-10 minutes post-injection) is caused by intense  
484 neuronal activity in the spinal cord and serves as a model of acute pain [59; 79]. The second  
485 behavioral phase (occurring 10-60 minutes post-injection) is mediated by sensitization of spinal

486 cord nociceptors and serves as a model of human chronic pain [59]. Spinal cord levels of c-fos,  
487 substance P, and excitatory amino acids also increase after formalin injection [79], inducing  
488 central sensitization via an excited nociceptive state similar to that observed in human chronic  
489 pain conditions [73; 74]. In the present study, we report that a point mutation in *Trpa1*  
490 (rs239908314) significantly reduces or even eliminates DO behavioral response during the late  
491 phase of the formalin test. This observation suggests that CNS sensitization mechanisms are  
492 critical for advancing the shift from acute to chronic pain and lends support to the idea that  
493 formalin induces a tonic pain state via CNS sensitization.

494 *Trpa1* is regulated by epigenetic modifications as well as non-coding RNAs [13; 31; 62;  
495 75]. Candidate gene analysis predicted the presence of 20 non-coding RNAs within the *Nociq4*  
496 region, including two microRNAs (miRNAs). Functional, phenotypic, and expression  
497 annotations for these genes are currently incomplete, and therefore, potential interactions  
498 between them and *Trpa1* or other *Nociq4* candidates may be missed. We identified 3' UTR  
499 variant rs215479411 as a possible *Trpa1* functional variant contributing to decreased late phase  
500 formalin response at *Nociq4*. We hypothesized a role for rs215479411 in *Trpa1* expression  
501 regulation based on the ability of miRNAs to degrade target transcripts by adhering to specific 3'  
502 UTR binding sites [62]. Our qRT-PCR data suggest that rs215479411 does not alter the post-  
503 transcriptional abundance of *Trpa1*, however, as only transcriptional isoform *Trpa1a* was found  
504 to be differentially expressed between CAST/EiJ and C57BL/6J.

505 The interaction of some of these expression regulatory mechanisms with sex hormones or  
506 developmental sex differences in a genotype-specific manner could account for the complex  
507 pattern of findings we obtained in our analysis of *Trpa1* and *Trpv1* clustering. Many other  
508 regulatory mechanisms are possible and this finding could merit further confirmation and

509 investigation. Genetic variation has been previously shown to influence both the magnitude and  
510 direction of sex differences in acute thermal nociception, and this same complexity no doubt  
511 exists for chronic pain [53]. Expression-QTL (eQTL) studies of *Trpa1* and other pain-related  
512 genes are warranted to gain new insights into the molecular genetic networks governing gene  
513 expression during acute, chronic, and pain-free states.

514 *Trpa1* is a polymodal chemosensor expressed primarily in nociceptive neurons of  
515 peripheral ganglia. It acts as a high-threshold chemo- and mechanosensor that integrates painful  
516 mechanical stimuli with other noxious signals [82]. Human TRPA1 is of particular interest as a  
517 drug target because of its expression in nociceptor sensory neurons and its capacity to transduce  
518 a wide variety of noxious chemical stimuli into action potentials [24]. Pharmaceutical TRPA1  
519 antagonists developed to date have proven most useful as *in vivo* and *in vitro* tools for studying  
520 TRPA1 biology [18]. This is perhaps due to the preferential activation of the channel by  
521 exogenous electrophilic agonists [9; 11; 12; 14; 35; 49]. In order for TRPA1 to be regarded as a  
522 suitable target for pain and other disorders, it must be active in the context of a pathological state  
523 [18]. TRPA1 has been found to play an important role in linking the presence of oxidative stress  
524 to inflammatory and neuropathic pain through the role of endogenous agonists such as oxidized  
525 lipids [80] and H<sub>2</sub>O<sub>2</sub> [5]. Because spinal activation of TRPA1 can be either nociceptive or  
526 antinociceptive [18], both antagonists and agonists of TRPA1 may have utility for pain relief.

527 TRPA1 activity undergoes functional desensitization through multiple cellular pathways  
528 which are not yet fully understood [3; 36]. Agonist exposure can increase the level of *Trpa1*  
529 expressed on the cell membrane surface, suggesting a putative mechanism by which alternative  
530 splice variant rs215479411 modulates decreased late phase response to formalin injection in  
531 CAST/EiJ mice. SNP rs215479411 may modulate *Trpa1* agonist response by leading to

532 increased cellular membrane expression of *Trpa1a* in CAST/EiJ, leading to quicker functional  
533 desensitization of the receptor compared to other DO inbred founder strains. This hypothesis is  
534 supported by Zhou and colleagues [86], who report dynamic changes in *Trpa1a* and *Trpa1b*  
535 expression levels during inflammatory and neuropathic pain conditions. Further investigation of  
536 this functional effect on *Trpa1* activity in humans is warranted to determine the potential clinical  
537 utility of the mechanism.

538         The work described in this article represents the first application of DO mice to chronic  
539 pain genetics research. Taken together, our results demonstrate that high-precision mapping of  
540 pain-related genetic variants can be achieved with moderate numbers of DO animals,  
541 representing a significant advance in our ability to leverage the mouse as a tool for the discovery  
542 of pain-related genes and therapeutic targets. Precise genetic analysis enabled us to identify not  
543 just the target gene, but three putative mechanisms of genetic effects on the phenotype. *Trpa1a/b*  
544 isoform regulation is involved in sparing of the intact acute pain response, which is a necessary  
545 sensory function, while specifically blocking the late phase response. Our results suggest that  
546 facilitating the effects of the *Trpa1a* isoform may have beneficial and specific effects on chronic  
547 but not acute pain. Applying our method of discovery to other pain-related traits may implicate  
548 other pain-relevant genes and novel variant contributions to pain response, facilitating the  
549 informed identification of therapeutics aided by the use of genetic precision to prioritize specific  
550 sub-molecular targets.

## 551 **Acknowledgements**

552 Dr. Recla reports a grant from the US Department of Defense (DOD) and grants from the  
553 National Institutes of Health (NIH) during the conduct of the study: This work was funded in  
554 part by DOD grant W81XWH-11-1-0762 (CJB). This project was also supported by NIH R01



555 DA 37927 and NIH R01 AA 18776 to EJC. We gratefully acknowledge The Jackson Laboratory  
556 (JAX) Scientific Services supported by NIH P30 CA034196, as well as the technical efforts of  
557 Andrew Garrett and Robert Burgess (JAX) for their work on HEK cell transfections. The  
558 authors declare no other conflicts of interest.

559

## 560 **References**

561

562 [1] Database of Single Nucleotide Polymorphisms (dbSNP). Bethesda (MD): National Center for  
563 Biotechnology Information, National Library of Medicine. (dbSNP Build ID: 150). Available  
564 from: <http://www.ncbi.nlm.nih.gov/SNP/>.

565 [2] Abbott FV, Franklin KB, Westbrook RF. The formalin test: scoring properties of the first and  
566 second phases of the pain response in rats. *Pain* 1995;60(1):91-102.  
567 <http://www.ncbi.nlm.nih.gov/pubmed/7715946>.

568 [3] Akopian AN, Ruparel NB, Jeske NA, Hargreaves KM. Transient receptor potential TRPA1  
569 channel desensitization in sensory neurons is agonist dependent and regulated by TRPV1-  
570 directed internalization. *J Physiol* 2007;583(Pt 1):175-193.  
571 <https://www.ncbi.nlm.nih.gov/pubmed/17584831>.

572 [4] Anand U, Otto WR, Facer P, Zebda N, Selmer I, Gunthorpe MJ, Chessell IP, Sinisi M, Birch  
573 R, Anand P. TRPA1 receptor localisation in the human peripheral nervous system and functional  
574 studies in cultured human and rat sensory neurons. *Neurosci Lett* 2008;438(2):221-227.  
575 <https://www.ncbi.nlm.nih.gov/pubmed/18456404>.

576 [5] Andersson DA, Gentry C, Moss S, Bevan S. Transient receptor potential A1 is a sensory  
577 receptor for multiple products of oxidative stress. *J Neurosci* 2008;28(10):2485-2494.  
578 <https://www.ncbi.nlm.nih.gov/pubmed/18322093>.

579 [6] Ashburner M, Ball CA, Blake JA, Botstein D, Butler H, Cherry JM, Davis AP, Dolinski K,  
580 Dwight SS, Eppig JT, Harris MA, Hill DP, Issel-Tarver L, Kasarskis A, Lewis S, Matese JC,  
581 Richardson JE, Ringwald M, Rubin GM, Sherlock G. Gene ontology: tool for the unification of  
582 biology. The Gene Ontology Consortium. *Nat Genet* 2000;25(1):25-29.  
583 <https://www.ncbi.nlm.nih.gov/pubmed/10802651>.

584 [7] Baker E, Bubier JA, Reynolds T, Langston MA, Chesler EJ. GeneWeaver: data driven  
585 alignment of cross-species genomics in biology and disease. *Nucleic Acids Res*  
586 2016;44(D1):D555-559. <https://www.ncbi.nlm.nih.gov/pubmed/26656951>.

- 587 [8] Baker EJ, Jay JJ, Bubier JA, Langston MA, Chesler EJ. GeneWeaver: a web-based system  
588 for integrative functional genomics. *Nucleic Acids Res* 2012;40(Database issue):D1067-1076.  
589 <http://www.ncbi.nlm.nih.gov/pubmed/22080549>.
- 590 [9] Bandell M, Story GM, Hwang SW, Viswanath V, Eid SR, Petrus MJ, Earley TJ, Patapoutian  
591 A. Noxious cold ion channel TRPA1 is activated by pungent compounds and bradykinin. *Neuron*  
592 2004;41(6):849-857. <https://www.ncbi.nlm.nih.gov/pubmed/15046718>.
- 593 [10] Barrett T, Wilhite SE, Ledoux P, Evangelista C, Kim IF, Tomashevsky M, Marshall KA,  
594 Phillippy KH, Sherman PM, Holko M, Yefanov A, Lee H, Zhang N, Robertson CL, Serova N,  
595 Davis S, Soboleva A. NCBI GEO: archive for functional genomics data sets--update. *Nucleic*  
596 *Acids Res* 2013;41(Database issue):D991-995. <http://www.ncbi.nlm.nih.gov/pubmed/23193258>.
- 597 [11] Bautista DM, Jordt SE, Nikai T, Tsuruda PR, Read AJ, Poblete J, Yamoah EN, Basbaum AI,  
598 Julius D. TRPA1 mediates the inflammatory actions of environmental irritants and proalgesic  
599 agents. *Cell* 2006;124(6):1269-1282. <https://www.ncbi.nlm.nih.gov/pubmed/16564016>.
- 600 [12] Bautista DM, Movahed P, Hinman A, Axelsson HE, Sterner O, Hogestatt ED, Julius D,  
601 Jordt SE, Zygmunt PM. Pungent products from garlic activate the sensory ion channel TRPA1.  
602 *Proc Natl Acad Sci U S A* 2005;102(34):12248-12252.  
603 <https://www.ncbi.nlm.nih.gov/pubmed/16103371>.
- 604 [13] Bell JT, Loomis AK, Butcher LM, Gao F, Zhang B, Hyde CL, Sun J, Wu H, Ward K, Harris  
605 J, Scollen S, Davies MN, Schalkwyk LC, Mill J, Mu TC, Williams FM, Li N, Deloukas P, Beck  
606 S, McMahon SB, Wang J, John SL, Spector TD. Differential methylation of the TRPA1  
607 promoter in pain sensitivity. *Nat Commun* 2014;5:2978.  
608 <http://www.ncbi.nlm.nih.gov/pubmed/24496475>.
- 609 [14] Bessac BF, Sivula M, von Hehn CA, Escalera J, Cohn L, Jordt SE. TRPA1 is a major  
610 oxidant sensor in murine airway sensory neurons. *J Clin Invest* 2008;118(5):1899-1910.  
611 <https://www.ncbi.nlm.nih.gov/pubmed/18398506>.
- 612 [15] Blake JA, Eppig JT, Kadin JA, Richardson JE, Smith CL, Bult CJ, the Mouse Genome  
613 Database G. Mouse Genome Database (MGD)-2017: community knowledge resource for the  
614 laboratory mouse. *Nucleic Acids Res* 2017;45(D1):D723-D729.  
615 <http://www.ncbi.nlm.nih.gov/pubmed/27899570>.
- 616 [16] Bogue MA, Grubb SC, Walton DO, Philip VM, Kolishovski G, Stearns T, Dunn MH,  
617 Skelly DA, Kadakkuzha B, TeHennepe G, Kunde-Ramamoorthy G, Chesler EJ. Mouse Phenome  
618 Database: an integrative database and analysis suite for curated empirical phenotype data from

- 619 laboratory mice. *Nucleic Acids Res* 2018;46(D1):D843-D850.  
620 <https://www.ncbi.nlm.nih.gov/pubmed/29136208>.
- 621 [17] Bush WS, Moore JH. Chapter 11: Genome-wide association studies. *PLoS Comput Biol*  
622 2012;8(12):e1002822. <http://www.ncbi.nlm.nih.gov/pubmed/23300413>.
- 623 [18] Chen J, Hackos DH. TRPA1 as a drug target--promise and challenges. *Naunyn*  
624 *Schmiedebergs Arch Pharmacol* 2015;388(4):451-463.  
625 <https://www.ncbi.nlm.nih.gov/pubmed/25640188>.
- 626 [19] Cheng R, Abney M, Palmer AA, Skol AD. QTLRel: an R package for genome-wide  
627 association studies in which relatedness is a concern. *BMC Genet* 2011;12:66.  
628 <http://www.ncbi.nlm.nih.gov/pubmed/21794153>.
- 629 [20] Chesler EJ, Miller DR, Branstetter LR, Galloway LD, Jackson BL, Philip VM, Voy BH,  
630 Culiati CT, Threadgill DW, Williams RW, Churchill GA, Johnson DK, Manly KF. The  
631 Collaborative Cross at Oak Ridge National Laboratory: developing a powerful resource for  
632 systems genetics. *Mamm Genome* 2008;19(6):382-389.  
633 <http://www.ncbi.nlm.nih.gov/pubmed/18716833>.
- 634 [21] Churchill GA, Gatti DM, Munger SC, Svenson KL. The Diversity Outbred mouse  
635 population. *Mamm Genome* 2012;23(9-10):713-718.  
636 <http://www.ncbi.nlm.nih.gov/pubmed/22892839>.
- 637 [22] Clapham DE. Structural biology: Pain-sensing TRPA1 channel resolved. *Nature*  
638 2015;520(7548):439-441. <https://www.ncbi.nlm.nih.gov/pubmed/25855290>.
- 639 [23] Collaborative Cross C. The genome architecture of the Collaborative Cross mouse genetic  
640 reference population. *Genetics* 2012;190(2):389-401.  
641 <http://www.ncbi.nlm.nih.gov/pubmed/22345608>.
- 642 [24] Cvetkov TL, Huynh KW, Cohen MR, Moiseenkova-Bell VY. Molecular architecture and  
643 subunit organization of TRPA1 ion channel revealed by electron microscopy. *J Biol Chem*  
644 2011;286(44):38168-38176. <https://www.ncbi.nlm.nih.gov/pubmed/21908607>.
- 645 [25] Doerner JF, Gisselmann G, Hatt H, Wetzel CH. Transient receptor potential channel A1 is  
646 directly gated by calcium ions. *J Biol Chem* 2007;282(18):13180-13189.  
647 <https://www.ncbi.nlm.nih.gov/pubmed/17353192>.

- 648 [26] Elzahaf RA, Tashani OA, Unsworth BA, Johnson MI. The prevalence of chronic pain with  
649 an analysis of countries with a Human Development Index less than 0.9: a systematic review  
650 without meta-analysis. *Curr Med Res Opin* 2012;28(7):1221-1229.  
651 <http://www.ncbi.nlm.nih.gov/pubmed/22697274>.
- 652 [27] Finn RD, Attwood TK, Babbitt PC, Bateman A, Bork P, Bridge AJ, Chang HY, Dosztanyi  
653 Z, El-Gebali S, Fraser M, Gough J, Haft D, Holliday GL, Huang H, Huang X, Letunic I, Lopez R,  
654 Lu S, Marchler-Bauer A, Mi H, Mistry J, Natale DA, Necci M, Nuka G, Orengo CA, Park Y,  
655 Pesseat S, Piovesan D, Potter SC, Rawlings ND, Redaschi N, Richardson L, Rivoire C,  
656 Sangrador-Vegas A, Sigrist C, Sillitoe I, Smithers B, Squizzato S, Sutton G, Thanki N, Thomas  
657 PD, Tosatto SC, Wu CH, Xenarios I, Yeh LS, Young SY, Mitchell AL. InterPro in 2017-beyond  
658 protein family and domain annotations. *Nucleic Acids Res* 2017;45(D1):D190-D199.  
659 <http://www.ncbi.nlm.nih.gov/pubmed/27899635>.
- 660 [28] Foulkes T, Wood JN. Pain genes. *PLoS Genet* 2008;4(7):e1000086.  
661 <http://www.ncbi.nlm.nih.gov/pubmed/18654615>.
- 662 [29] Gatti DM, Svenson KL, Shabalin A, Wu LY, Valdar W, Simecek P, Goodwin N, Cheng R,  
663 Pomp D, Palmer A, Chesler EJ, Broman KW, Churchill GA. Quantitative trait locus mapping  
664 methods for diversity outbred mice. *G3 (Bethesda)* 2014;4(9):1623-1633.  
665 <http://www.ncbi.nlm.nih.gov/pubmed/25237114>.
- 666 [30] Gaudet R. A primer on ankyrin repeat function in TRP channels and beyond. *Mol Biosyst*  
667 2008;4(5):372-379. <https://www.ncbi.nlm.nih.gov/pubmed/18414734>.
- 668 [31] Gombert S, Rhein M, Eberhardt M, Munster T, Bleich S, Leffler A, Frieling H. Epigenetic  
669 divergence in the TRPA1 promoter correlates with pressure pain thresholds in healthy  
670 individuals. *Pain* 2017;158(4):698-704. <http://www.ncbi.nlm.nih.gov/pubmed/28030472>.
- 671 [32] Gorina S, Pavletich NP. Structure of the p53 tumor suppressor bound to the ankyrin and  
672 SH3 domains of 53BP2. *Science* 1996;274(5289):1001-1005.  
673 <http://www.ncbi.nlm.nih.gov/pubmed/8875926>.
- 674 [33] Hinman A, Chuang HH, Bautista DM, Julius D. TRP channel activation by reversible  
675 covalent modification. *Proc Natl Acad Sci U S A* 2006;103(51):19564-19568.  
676 <https://www.ncbi.nlm.nih.gov/pubmed/17164327>.
- 677 [34] Hocking LJ, Generation S, Morris AD, Dominiczak AF, Porteous DJ, Smith BH.  
678 Heritability of chronic pain in 2195 extended families. *Eur J Pain* 2012;16(7):1053-1063.  
679 <https://www.ncbi.nlm.nih.gov/pubmed/22337623>.

- 680 [35] Jordt SE, Bautista DM, Chuang HH, McKemy DD, Zygmunt PM, Hogestatt ED, Meng ID,  
681 Julius D. Mustard oils and cannabinoids excite sensory nerve fibres through the TRP channel  
682 ANKTM1. *Nature* 2004;427(6971):260-265. <https://www.ncbi.nlm.nih.gov/pubmed/14712238>.
- 683 [36] Kadkova A, Synytsya V, Krusek J, Zimova L, Vlachova V. Molecular basis of TRPA1  
684 regulation in nociceptive neurons. A review. *Physiol Res* 2017;66(3):425-439.  
685 <https://www.ncbi.nlm.nih.gov/pubmed/28730837>.
- 686 [37] Keane TM, Goodstadt L, Danecek P, White MA, Wong K, Yalcin B, Heger A, Agam A,  
687 Slater G, Goodson M, Furlotte NA, Eskin E, Nellaker C, Whitley H, Cleak J, Janowitz D,  
688 Hernandez-Pliego P, Edwards A, Belgard TG, Oliver PL, McIntyre RE, Bhomra A, Nicod J, Gan  
689 X, Yuan W, van der Weyden L, Steward CA, Bala S, Stalker J, Mott R, Durbin R, Jackson IJ,  
690 Czechanski A, Guerra-Assuncao JA, Donahue LR, Reinholdt LG, Payseur BA, Ponting CP,  
691 Birney E, Flint J, Adams DJ. Mouse genomic variation and its effect on phenotypes and gene  
692 regulation. *Nature* 2011;477(7364):289-294. <http://www.ncbi.nlm.nih.gov/pubmed/21921910>.
- 693 [38] Koivisto A, Chapman H, Jalava N, Korjamo T, Saarnilehto M, Lindstedt K, Pertovaara A.  
694 TRPA1: a transducer and amplifier of pain and inflammation. *Basic Clin Pharmacol Toxicol*  
695 2014;114(1):50-55. <https://www.ncbi.nlm.nih.gov/pubmed/24102997>.
- 696 [39] Kremeyer B, Lopera F, Cox JJ, Momin A, Rugiero F, Marsh S, Woods CG, Jones NG,  
697 Paterson KJ, Fricker FR, Villegas A, Acosta N, Pineda-Trujillo NG, Ramirez JD, Zea J, Burley  
698 MW, Bedoya G, Bennett DL, Wood JN, Ruiz-Linares A. A gain-of-function mutation in TRPA1  
699 causes familial episodic pain syndrome. *Neuron* 2010;66(5):671-680.  
700 <http://www.ncbi.nlm.nih.gov/pubmed/20547126>.
- 701 [40] Kwan KY, Allchorne AJ, Vollrath MA, Christensen AP, Zhang DS, Woolf CJ, Corey DP.  
702 TRPA1 contributes to cold, mechanical, and chemical nociception but is not essential for hair-  
703 cell transduction. *Neuron* 2006;50(2):277-289. <https://www.ncbi.nlm.nih.gov/pubmed/16630838>.
- 704 [41] Kwan KY, Glazer JM, Corey DP, Rice FL, Stucky CL. TRPA1 modulates  
705 mechanotransduction in cutaneous sensory neurons. *J Neurosci* 2009;29(15):4808-4819.  
706 <http://www.ncbi.nlm.nih.gov/pubmed/19369549>.
- 707 [42] Lacroix-Fralish ML, Ledoux JB, Mogil JS. The Pain Genes Database: An interactive web  
708 browser of pain-related transgenic knockout studies. *Pain* 2007;131(1-2):3 e1-4.  
709 <http://www.ncbi.nlm.nih.gov/pubmed/17574758>.
- 710 [43] Lafreniere RG, Cader MZ, Poulin JF, Andres-Enguix I, Simoneau M, Gupta N, Boisvert K,  
711 Lafreniere F, McLaughlan S, Dube MP, Marcinkiewicz MM, Ramagopalan S, Ansoorge O, Brais  
712 B, Sequeiros J, Pereira-Monteiro JM, Griffiths LR, Tucker SJ, Ebers G, Rouleau GA. A

713 dominant-negative mutation in the TRESK potassium channel is linked to familial migraine with  
714 aura. *Nat Med* 2010;16(10):1157-1160. <https://www.ncbi.nlm.nih.gov/pubmed/20871611>.

715 [44] Laursen WJ, Bagriantsev SN, Gracheva EO. TRPA1 channels: chemical and temperature  
716 sensitivity. *Curr Top Membr* 2014;74:89-112. <http://www.ncbi.nlm.nih.gov/pubmed/25366234>.

717 [45] Lee LY, Hsu CC, Lin YJ, Lin RL, Khosravi M. Interaction between TRPA1 and TRPV1:  
718 Synergy on pulmonary sensory nerves. *Pulm Pharmacol Ther* 2015;35:87-93.  
719 <http://www.ncbi.nlm.nih.gov/pubmed/26283426>.

720 [46] Lein ES, Hawrylycz MJ, Ao N, Ayres M, Bensinger A, Bernard A, Boe AF, Boguski MS,  
721 Brockway KS, Byrnes EJ, Chen L, Chen L, Chen TM, Chin MC, Chong J, Crook BE,  
722 Czaplinska A, Dang CN, Datta S, Dee NR, Desaki AL, Desta T, Diep E, Dolbeare TA, Donelan  
723 MJ, Dong HW, Dougherty JG, Duncan BJ, Ebbert AJ, Eichele G, Estin LK, Faber C, Facer BA,  
724 Fields R, Fischer SR, Fliss TP, Frensley C, Gates SN, Glattfelder KJ, Halverson KR, Hart MR,  
725 Hohmann JG, Howell MP, Jeung DP, Johnson RA, Karr PT, Kawal R, Kidney JM, Knapik RH,  
726 Kuan CL, Lake JH, Laramie AR, Larsen KD, Lau C, Lemon TA, Liang AJ, Liu Y, Luong LT,  
727 Michaels J, Morgan JJ, Morgan RJ, Mortrud MT, Mosqueda NF, Ng LL, Ng R, Orta GJ, Overly  
728 CC, Pak TH, Parry SE, Pathak SD, Pearson OC, Puchalski RB, Riley ZL, Rockett HR, Rowland  
729 SA, Royall JJ, Ruiz MJ, Sarno NR, Schaffnit K, Shapovalova NV, Sivasay T, Slaughterbeck CR,  
730 Smith SC, Smith KA, Smith BI, Sodt AJ, Stewart NN, Stumpf KR, Sunkin SM, Sutram M, Tam  
731 A, Teemer CD, Thaller C, Thompson CL, Varnam LR, Visel A, Whitlock RM, Wohnoutka PE,  
732 Wolkey CK, Wong VY, Wood M, Yaylaoglu MB, Young RC, Youngstrom BL, Yuan XF,  
733 Zhang B, Zwingman TA, Jones AR. Genome-wide atlas of gene expression in the adult mouse  
734 brain. *Nature* 2007;445(7124):168-176. <http://www.ncbi.nlm.nih.gov/pubmed/17151600>.

735 [47] Logan RW, Robledo RF, Recla JM, Philip VM, Bubier JA, Jay JJ, Harwood C, Wilcox T,  
736 Gatti DM, Bult CJ, Churchill GA, Chesler EJ. High-precision genetic mapping of behavioral  
737 traits in the diversity outbred mouse population. *Genes Brain Behav* 2013;12(4):424-437.  
738 <http://www.ncbi.nlm.nih.gov/pubmed/23433259>.

739 [48] Macpherson LJ, Dubin AE, Evans MJ, Marr F, Schultz PG, Cravatt BF, Patapoutian A.  
740 Noxious compounds activate TRPA1 ion channels through covalent modification of cysteines.  
741 *Nature* 2007;445(7127):541-545. <https://www.ncbi.nlm.nih.gov/pubmed/17237762>.

742 [49] Macpherson LJ, Geierstanger BH, Viswanath V, Bandell M, Eid SR, Hwang S, Patapoutian  
743 A. The pungency of garlic: activation of TRPA1 and TRPV1 in response to allicin. *Curr Biol*  
744 2005;15(10):929-934. <https://www.ncbi.nlm.nih.gov/pubmed/15916949>.



- 745 [50] Macpherson LJ, Xiao B, Kwan KY, Petrus MJ, Dubin AE, Hwang S, Cravatt B, Corey DP,  
746 Patapoutian A. An ion channel essential for sensing chemical damage. *J Neurosci*  
747 2007;27(42):11412-11415. <https://www.ncbi.nlm.nih.gov/pubmed/17942735>.
- 748 [51] McNamara CR, Mandel-Brehm J, Bautista DM, Siemens J, Deranian KL, Zhao M,  
749 Hayward NJ, Chong JA, Julius D, Moran MM, Fanger CM. TRPA1 mediates formalin-induced  
750 pain. *Proc Natl Acad Sci U S A* 2007;104(33):13525-13530.  
751 <https://www.ncbi.nlm.nih.gov/pubmed/17686976>.
- 752 [52] Micklitsch CM, Medina SH, Yucel T, Nagy-Smith KJ, Pochan DJ, Schneider JP. Influence  
753 of Hydrophobic Face Amino Acids on the Hydrogelation of beta-Hairpin Peptide Amphiphiles.  
754 *Macromolecules* 2015;48(5):1281-1288. <Go to ISI>://WOS:000350918700002.
- 755 [53] Mogil JS, Chesler EJ, Wilson SG, Juraska JM, Sternberg WF. Sex differences in thermal  
756 nociception and morphine antinociception in rodents depend on genotype. *Neurosci Biobehav*  
757 *Rev* 2000;24(3):375-389. <https://www.ncbi.nlm.nih.gov/pubmed/10781697>.
- 758 [54] Mogil JS, Miermeister F, Seifert F, Strasburg K, Zimmermann K, Reinold H, Austin JS,  
759 Bernardini N, Chesler EJ, Hofmann HA, Hordo C, Messlinger K, Nemmani KV, Rankin AL,  
760 Ritchie J, Siegling A, Smith SB, Sotocinal S, Vater A, Lehto SG, Klussmann S, Quirion R,  
761 Michaelis M, Devor M, Reeh PW. Variable sensitivity to noxious heat is mediated by differential  
762 expression of the CGRP gene. *Proc Natl Acad Sci U S A* 2005b;102(36):12938-12943.  
763 <http://www.ncbi.nlm.nih.gov/pubmed/16118273>.
- 764 [55] Mogil JS, Ritchie J, Smith SB, Strasburg K, Kaplan L, Wallace MR, Romberg RR, Bijl H,  
765 Sarton EY, Fillingim RB, Dahan A. Melanocortin-1 receptor gene variants affect pain and mu-  
766 opioid analgesia in mice and humans. *J Med Genet* 2005a;42(7):583-587.  
767 <http://www.ncbi.nlm.nih.gov/pubmed/15994880>.
- 768 [56] Mogil JS, Wilson SG, Chesler EJ, Rankin AL, Nemmani KV, Lariviere WR, Groce MK,  
769 Wallace MR, Kaplan L, Staud R, Ness TJ, Glover TL, Stankova M, Mayorov A, Hraby VJ,  
770 Grisel JE, Fillingim RB. The melanocortin-1 receptor gene mediates female-specific mechanisms  
771 of analgesia in mice and humans. *Proc Natl Acad Sci U S A* 2003;100(8):4867-4872.  
772 <http://www.ncbi.nlm.nih.gov/pubmed/12663858>.
- 773 [57] Nassini R, Materazzi S, Benemei S, Geppetti P. The TRPA1 channel in inflammatory and  
774 neuropathic pain and migraine. *Rev Physiol Biochem Pharmacol* 2014;167:1-43.  
775 <http://www.ncbi.nlm.nih.gov/pubmed/24668446>.
- 776 [58] Neogen. Mouse Genotyping - Universal Genotyping Array Service: Neogen Corporation,  
777 2010.

- 778 [59] Niederberger E, Schmidtko A, Gao W, Kuhlein H, Ehnert C, Geisslinger G. Impaired acute  
779 and inflammatory nociception in mice lacking the p50 subunit of NF-kappaB. *Eur J Pharmacol*  
780 2007;559(1):55-60. <http://www.ncbi.nlm.nih.gov/pubmed/17217946>.
- 781 [60] Nielsen CS, Knudsen GP, Steingrimsdottir OA. Twin studies of pain. *Clin Genet*  
782 2012;82(4):331-340. <https://www.ncbi.nlm.nih.gov/pubmed/22823509>.
- 783 [61] Nissenbaum J. From mouse to humans: discovery of the CACNG2 pain susceptibility gene.  
784 *Clin Genet* 2012;82(4):311-320. <https://www.ncbi.nlm.nih.gov/pubmed/22775325>.
- 785 [62] Park CK, Xu ZZ, Berta T, Han Q, Chen G, Liu XJ, Ji RR. Extracellular microRNAs activate  
786 nociceptor neurons to elicit pain via TLR7 and TRPA1. *Neuron* 2014;82(1):47-54.  
787 <https://www.ncbi.nlm.nih.gov/pubmed/24698267>.
- 788 [63] Petryszak R, Keays M, Tang YA, Fonseca NA, Barrera E, Burdett T, Fullgrabe A, Fuentes  
789 AM, Jupp S, Koskinen S, Mannion O, Huerta L, Megy K, Snow C, Williams E, Barzine M,  
790 Hastings E, Weisser H, Wright J, Jaiswal P, Huber W, Choudhary J, Parkinson HE, Brazma A.  
791 Expression Atlas update--an integrated database of gene and protein expression in humans,  
792 animals and plants. *Nucleic Acids Res* 2016;44(D1):D746-752.  
793 <https://www.ncbi.nlm.nih.gov/pubmed/26481351>.
- 794 [64] Ramsey IS, Delling M, Clapham DE. An introduction to TRP channels. *Annu Rev Physiol*  
795 2006;68:619-647. <https://www.ncbi.nlm.nih.gov/pubmed/16460286>.
- 796 [65] Raouf R, Quick K, Wood JN. Pain as a channelopathy. *J Clin Invest* 2010;120(11):3745-  
797 3752. <http://www.ncbi.nlm.nih.gov/pubmed/21041956>.
- 798 [66] Recla JM, Robledo RF, Gatti DM, Bult CJ, Churchill GA, Chesler EJ. Precise genetic  
799 mapping and integrative bioinformatics in Diversity Outbred mice reveals Hydin as a novel pain  
800 gene. *Mamm Genome* 2014;25(5-6):211-222. <http://www.ncbi.nlm.nih.gov/pubmed/24700285>.
- 801 [67] Reimann F, Cox JJ, Belfer I, Diatchenko L, Zaykin DV, McHale DP, Drenth JP, Dai F,  
802 Wheeler J, Sanders F, Wood L, Wu TX, Karppinen J, Nikolajsen L, Männikkö M, Max MB,  
803 Kiselycznyk C, Poddar M, Te Morsche RH, Smith S, Gibson D, Kelempisioti A, Maixner W,  
804 Gribble FM, Woods CG. Pain perception is altered by a nucleotide polymorphism in SCN9A.  
805 *Proc Natl Acad Sci U S A* 2010;107(11):5148-5153.
- 806 [68] Shatzky S, Moses S, Levy J, Pinsk V, Hershkovitz E, Herzog L, Shorer Z, Luder A, Parvari  
807 R. Congenital insensitivity to pain with anhidrosis (CIPA) in Israeli-Bedouins: genetic  
808 heterogeneity, novel mutations in the TRKA/NGF receptor gene, clinical findings, and results of



- 809 nerve conduction studies. *Am J Med Genet* 2000;92(5):353-360.  
810 <https://www.ncbi.nlm.nih.gov/pubmed/10861667>.
- 811 [69] Sherry ST, Ward MH, Kholodov M, Baker J, Phan L, Smigielski EM, Sirotkin K. dbSNP:  
812 the NCBI database of genetic variation. *Nucleic Acids Res* 2001;29(1):308-311.  
813 <https://www.ncbi.nlm.nih.gov/pubmed/11125122>.
- 814 [70] Smith CL, Eppig JT. The Mammalian Phenotype Ontology as a unifying standard for  
815 experimental and high-throughput phenotyping data. *Mamm Genome* 2012;23(9-10):653-668.  
816 <http://www.ncbi.nlm.nih.gov/pubmed/22961259>.
- 817 [71] Smith CM, Finger JH, Hayamizu TF, McCright IJ, Eppig JT, Kadin JA, Richardson JE,  
818 Ringwald M. The mouse Gene Expression Database (GXD): 2007 update. *Nucleic Acids Res*  
819 2007;35(Database issue):D618-623. <https://www.ncbi.nlm.nih.gov/pubmed/17130151>.
- 820 [72] Staruschenko A, Jeske NA, Akopian AN. Contribution of TRPV1-TRPA1 interaction to the  
821 single channel properties of the TRPA1 channel. *J Biol Chem* 2010;285(20):15167-15177.  
822 <https://www.ncbi.nlm.nih.gov/pubmed/20231274>.
- 823 [73] Staud R. Evidence of involvement of central neural mechanisms in generating fibromyalgia  
824 pain. *Curr Rheumatol Rep* 2002;4(4):299-305. <http://www.ncbi.nlm.nih.gov/pubmed/12126581>.
- 825 [74] Staud R. Biology and therapy of fibromyalgia: pain in fibromyalgia syndrome. *Arthritis Res*  
826 *Ther* 2006;8(3):208. <http://www.ncbi.nlm.nih.gov/pubmed/16684376>.
- 827 [75] Sukenaga N, Ikeda-Miyagawa Y, Tanada D, Tunetoh T, Nakano S, Inui T, Satoh K, Okutani  
828 H, Noguchi K, Hirose M. Correlation Between DNA Methylation of TRPA1 and Chronic Pain  
829 States in Human Whole Blood Cells. *Pain Med* 2016;17(10):1906-1910.  
830 <http://www.ncbi.nlm.nih.gov/pubmed/26849948>.
- 831 [76] Svenson KL, Gatti DM, Valdar W, Welsh CE, Cheng R, Chesler EJ, Palmer AA, McMillan  
832 L, Churchill GA. High-resolution genetic mapping using the Mouse Diversity outbred population.  
833 *Genetics* 2012;190(2):437-447. <http://www.ncbi.nlm.nih.gov/pubmed/22345611>.
- 834 [77] Tegeder I, Costigan M, Griffin RS, Abele A, Belfer I, Schmidt H, Ehnert C, Nejm J,  
835 Marian C, Scholz J, Wu T, Allchorne A, Diatchenko L, Binshtok AM, Goldman D, Adolph J,  
836 Sama S, Atlas SJ, Carlezon WA, Parsegian A, Lotsch J, Fillingim RB, Maixner W, Geisslinger G,  
837 Max MB, Woolf CJ. GTP cyclohydrolase and tetrahydrobiopterin regulate pain sensitivity and  
838 persistence. *Nat Med* 2006;12(11):1269-1277. <https://www.ncbi.nlm.nih.gov/pubmed/17057711>.

- 839 [78] The Gene Ontology C. Expansion of the Gene Ontology knowledgebase and resources.  
840 Nucleic Acids Res 2017;45(D1):D331-D338. <https://www.ncbi.nlm.nih.gov/pubmed/27899567>.
- 841 [79] Tjolsen A, Berge OG, Hunskaar S, Rosland JH, Hole K. The formalin test: an evaluation of  
842 the method. Pain 1992;51(1):5-17. <http://www.ncbi.nlm.nih.gov/pubmed/1454405>.
- 843 [80] Trevisan G, Hoffmeister C, Rossato MF, Oliveira SM, Silva MA, Silva CR, Fusi C, Tonello  
844 R, Minocci D, Guerra GP, Materazzi S, Nassini R, Geppetti P, Ferreira J. TRPA1 receptor  
845 stimulation by hydrogen peroxide is critical to trigger hyperalgesia and inflammation in a model  
846 of acute gout. Free Radic Biol Med 2014;72:200-209.  
847 <https://www.ncbi.nlm.nih.gov/pubmed/24780252>.
- 848 [81] Welsh CE, Miller DR, Manly KF, Wang J, McMillan L, Morahan G, Mott R, Iraqi FA,  
849 Threadgill DW, de Villena FP. Status and access to the Collaborative Cross population. Mamm  
850 Genome 2012;23(9-10):706-712. <http://www.ncbi.nlm.nih.gov/pubmed/22847377>.
- 851 [82] Weng HJ, Patel KN, Jeske NA, Bierbower SM, Zou W, Tiwari V, Zheng Q, Tang Z, Mo  
852 GC, Wang Y, Geng Y, Zhang J, Guan Y, Akopian AN, Dong X. Tmem100 Is a Regulator of  
853 TRPA1-TRPV1 Complex and Contributes to Persistent Pain. Neuron 2015;85(4):833-846.  
854 <http://www.ncbi.nlm.nih.gov/pubmed/25640077>.
- 855 [83] Witschas K. A TR(i)P into channel gating – from proteins to lipids. Mathematics, Computer  
856 Science and Natural Sciences, Vol. Doctor of Natural Sciences: RWTH Aachen University, 2012.  
857 p. 127.
- 858 [84] Yang Y, Wang Y, Li S, Xu Z, Li H, Ma L, Fan J, Bu D, Liu B, Fan Z, Wu G, Jin J, Ding B,  
859 Zhu X, Shen Y. Mutations in SCN9A, encoding a sodium channel alpha subunit, in patients with  
860 primary erythralgia. J Med Genet 2004;41(3):171-174.  
861 <https://www.ncbi.nlm.nih.gov/pubmed/14985375>.
- 862 [85] Zerbino DR, Achuthan P, Akanni W, Amode MR, Barrell D, Bhai J, Billis K, Cummins C,  
863 Gall A, Giron CG, Gil L, Gordon L, Haggerty L, Haskell E, Hourlier T, Izuogu OG, Janacek SH,  
864 Juettemann T, To JK, Laird MR, Lavidas I, Liu Z, Loveland JE, Maurel T, McLaren W, Moore  
865 B, Mudge J, Murphy DN, Newman V, Nuhn M, Ogeh D, Ong CK, Parker A, Patricio M, Riat  
866 HS, Schuilenburg H, Sheppard D, Sparrow H, Taylor K, Thormann A, Vullo A, Walts B,  
867 Zadissa A, Frankish A, Hunt SE, Kostadima M, Langridge N, Martin FJ, Muffato M, Perry E,  
868 Ruffier M, Staines DM, Trevanion SJ, Aken BL, Cunningham F, Yates A, Flicek P. Ensembl  
869 2018. Nucleic Acids Res 2018;46(D1):D754-D761.  
870 <https://www.ncbi.nlm.nih.gov/pubmed/29155950>.

- 871 [86] Zhou Y, Suzuki Y, Uchida K, Tominaga M. Identification of a splice variant of mouse  
872 TRPA1 that regulates TRPA1 activity. *Nat Commun* 2013;4:2399.  
873 <http://www.ncbi.nlm.nih.gov/pubmed/24008932>.
- 874 [87] Zhu Y, Richardson JE, Hale P, Baldarelli RM, Reed DJ, Recla JM, Sinclair R, Reddy TB,  
875 Bult CJ. A unified gene catalog for the laboratory mouse reference genome. *Mamm Genome*  
876 2015;26(7-8):295-304. <http://www.ncbi.nlm.nih.gov/pubmed/26084703>.
- 877 [88] Zorina-Lichtenwalter K, Meloto CB, Khoury S, Diatchenko L. Genetic predictors of human  
878 chronic pain conditions. *Neuroscience* 2016;338:36-62.  
879 <https://www.ncbi.nlm.nih.gov/pubmed/27143481>.
- 880 [89] Zorina-Lichtenwalter K, Parisien M, Diatchenko L. Genetic studies of human neuropathic  
881 pain conditions: a review. *Pain* 2018;159(3):583-594.  
882
- 883

884 **Table 1. *Trpa1* SNPs significant for late phase formalin response unique to CAST/EiJ.**  
885 (Bold italics denote variants selected for characterization based on functional class).  
886

| <b>rsID</b>               | <b>Position (bp)<br/>(GRCm38)</b> | <b>Ref<br/>Allele</b> | <b>Alt<br/>Allele</b> | <b><i>Trpa1</i> location<sup>a</sup></b> | <b>Functional class<sup>b</sup></b> |
|---------------------------|-----------------------------------|-----------------------|-----------------------|------------------------------------------|-------------------------------------|
| <b><i>rs215479411</i></b> | <b><i>14872864</i></b>            | <b><i>C</i></b>       | <b><i>A</i></b>       | <b><i>3' UTR variant</i></b>             | <b><i>3' UTR variant</i></b>        |
| rs240389458               | 14882175                          | G                     | A                     | exon 22                                  | Synonymous variant                  |
| <b><i>rs239908314</i></b> | <b><i>14884107</i></b>            | <b><i>T</i></b>       | <b><i>G</i></b>       | <b><i>intron 21</i></b>                  | <b><i>Splice region variant</i></b> |
| rs262385541               | 14884181                          | C                     | T                     | exon 21                                  | Synonymous variant                  |
| rs245414067               | 14884229                          | A                     | G                     | exon 21                                  | Synonymous variant                  |
| rs219630558               | 14898047                          | G                     | A                     | exon 12                                  | Synonymous variant                  |
| rs233861326               | 14898248                          | G                     | A                     | intron 11                                | Splice region variant               |
| rs243856490               | 14901865                          | T                     | G                     | exon 8                                   | Synonymous variant                  |
| rs252121819               | 14904526                          | C                     | T                     | exon 5                                   | Synonymous variant                  |
| rs248884581               | 14905986                          | C                     | T                     | exon 4                                   | Synonymous variant                  |
| <b><i>rs32035600</i></b>  | <b><i>14910834</i></b>            | <b><i>C</i></b>       | <b><i>T</i></b>       | <b><i>exon 3</i></b>                     | <b><i>Missense variant</i></b>      |
| rs238899246               | 14912367                          | C                     | T                     | exon 2                                   | Synonymous variant                  |
| rs32036619                | 14912526                          | G                     | A                     | intron 1                                 | Splice region variant               |

887

888 <sup>a</sup> Source: NCBI dbSNP Build 150 [1; 69].

889 <sup>b</sup> Source: Sanger Mouse Genomes Project version 5; REL-1505 [37].

890

891 **Figure Legends**

892 **Figure 1. Late phase formalin response has a significant QTL on mouse chromosome 1**  
893 **(*Nociq4*).** **A.** Genome-wide scan for late phase response to formalin injection reveals a QTL with  
894 a peak LOD score of 5.71 at 14.25 Mb. Permutation-derived significance thresholds are marked  
895 by horizontal lines: 0.63 (bottom), 0.1 (middle), 0.05 (top). **B.** The founder allele effects show  
896 that the CAST/EiJ allele contributes to lower late phase formalin response sensitivity. Each line  
897 represents the effect of one of the eight founder alleles in DO mice. The differences between  
898 strains are significant when the LOD score in panel C is high. **C.** Genome scan for sensitivity to  
899 late phase formalin response on chromosome 1.  
900

901 **Figure 2. *Trpa1* lies within a genetically mapped region of chromosome 1 significantly**  
902 **correlated with late phase behavioral response to formalin injection.** **A.** Minor allele  
903 frequency of the SNPs with the highest LOD score and shown in red in panel B. Strains: A, A/J;  
904 B, C57BL/6J; C, 129S1/SvImJ; D, NOD/ShiLtJ; E, NZO/HILtJ; F, CAST/EiJ; G, PWK/PhJ; H,  
905 WSB/EiJ. SNPs for which only CAST/EiJ (F) contributes the alternate allele have the highest  
906 LOD scores at the *Nociq4* locus. **B.** LOD scores of SNP association mapping in the chromosome  
907 1 QTL interval. Each point represents the LOD score from one SNP. Red SNPs represent a 1-  
908 LOD drop from the maximum LOD. **C.** Candidate protein coding genes underlying the *Nociq4*  
909 locus relative to mouse genome build GRCm38 and Ensembl annotation version 75 [85]. Top  
910 candidate gene *Trpa1* is circled in blue (Chr1:14.87-14.91 [-]).  
911

912 **Figure 3. GeneWeaver analysis corroborates *Trpa1* as most likely *Nociq4* candidate gene.**  
913 Output from the gene set graph tool showing *Trpa1* as the most highly connected gene. The  
914 genes are represented by oval shaped nodes, edges represent gene set membership, and the  
915 rectangular nodes represent gene sets retrieved from the GeneWeaver database. Other highly  
916 connected genes include *Eya1*, *Tram1*, *Lactb1*, *Slo5a1*, *Sulf1*, *Ncoa2*.  
917

918 **Figure 4. CAST/EiJ mice exhibit a strain-specific response to formalin injection at *Nociq4*.**  
919 Averaging founder strain allele effects over time relative to *Nociq4* indicates a unique  
920 contribution by the CAST/EiJ allele to lower phenotypic response during late phase formalin  
921 injection. Each line represents the effect of one of the eight founder alleles in DO mice. **A.** All 8  
922 DO founder strains respond similarly during the early (acute pain) phase following formalin  
923 injection (0-10 mins). **B.** All 8 strains exhibit a drop in phenotypic response ~10 mins post-  
924 injection, which signifies the shift from the acute pain response (early phase) to the (late phase)  
925 chronic pain response. **C.** Only CAST/EiJ does not develop the “tonic” or chronic pain behavior  
926 typically associated with late phase behavioral response to formalin injection (10-60 mins).  
927

928 **Figure 5. Schematic representation of potential functional effects of *Trpa1* candidate SNPs**  
929 **in C57BL/6J and CAST/EiJ.** (I) SNP rs32035600 induces a valine 115 to isoleucine shift (a  
930 difference of one methyl group) between the strains in the ankyrin repeat domain of *Trpa1*. The  
931 slight side chain change may alter the structure and thus functional properties of the protein. (II)

932 The same amino acid changing SNP, rs32035600, could affect *Trpa1* function in an allele  
933 specific manner by altering the *Trpv1-Trpa1* interaction. (III) SNP rs239908314 in intron 21  
934 regulates the expression and/or alternative splicing of the *Trpa1* transcript, affecting levels of  
935 *Trpa1a* and *Trpa1b* on the cell membrane. *Trpa1a* and *Trpa1b* expression levels could also be  
936 influenced by 3' UTR SNP rs215479411 – if the same differential expression pattern is observed  
937 for both isoforms.  
938

939 **Figure 6. The *Trpa1* CAST/EiJ variant rs32035600 does not significantly alter *Trpa1***  
940 **channel conductance in HEK293T cells.** **A.** Both C57BL/6J and CAST/EiJ alleles of *Trpa1*  
941 variant rs32035600 showed robust responses to the application of mustard oil (MO) during  
942 whole-cell patch clamp recording in HEK293T cells 48-72h after transfection. **B.** There was no  
943 difference between C57BL/6J (n=15 cells) and CAST/EiJ (n=19 cells) *Trpa1* in current  
944 amplitude ( $p = 0.56$ ). There was no difference between C57BL/6J and CAST/EiJ *Trpa1* in the  
945 rise time (**C.**) (10-90% of peak;  $p = 0.34$ ) or decay time (**D.**) ( $p = 0.47$ ) of MO-induced currents.  
946  
947

948 **Figure 7. Quantification of western blot intensity of TRPA1-TRPV1 coupling shows a sex x**  
949 **genotype effect.** CAST/EiJ males have a heightened response to formalin that results in  
950 increased receptor co-IP and C57BL/6J females decrease receptor co-IP in response at 30 mins  
951 post-formalin injection.  
952

953 **Figure 8. Quantitative-PCR shows higher average concentration of *Trpa1a* in the dorsal**  
954 **root ganglia (DRG) of naïve male and female CAST/EiJ compared to C57BL/6J mice.**  
955 Total *Trpa1* expression is approximately doubled in CAST/EiJ mice compared to age- and sex-  
956 matched C57BL/6J controls. When both *Trpa1a* and *Trpa1b* isoforms are considered, only  
957 *Trpa1a* is differentially expressed between the strains, expressed nearly 3x higher in CAST/EiJ  
958 DRG.

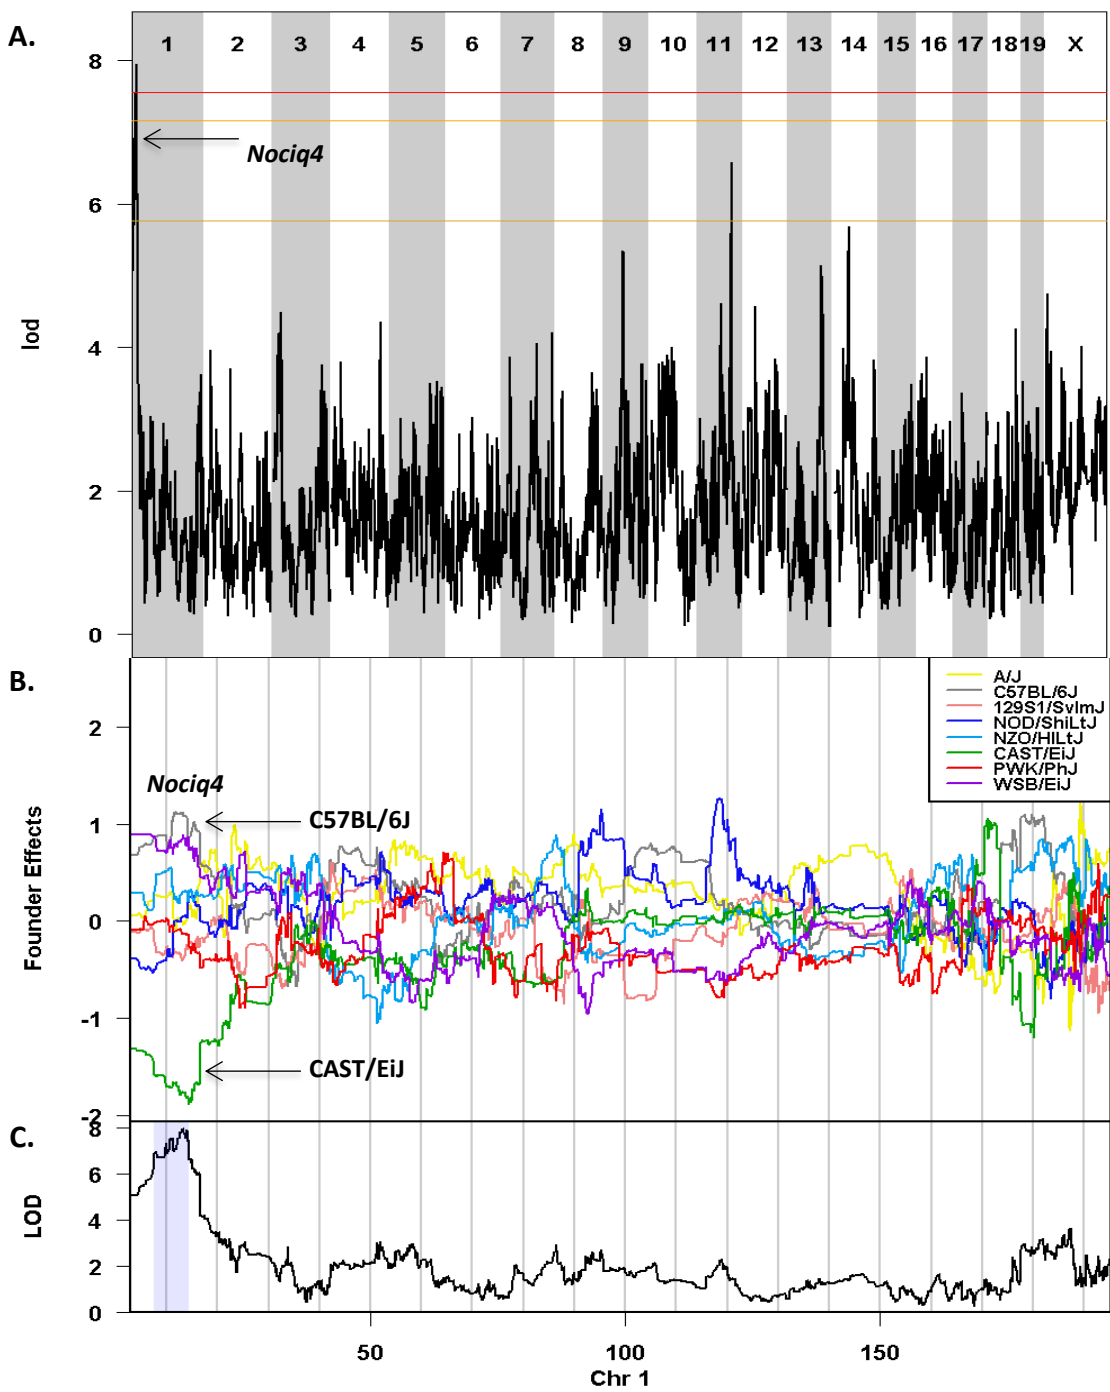

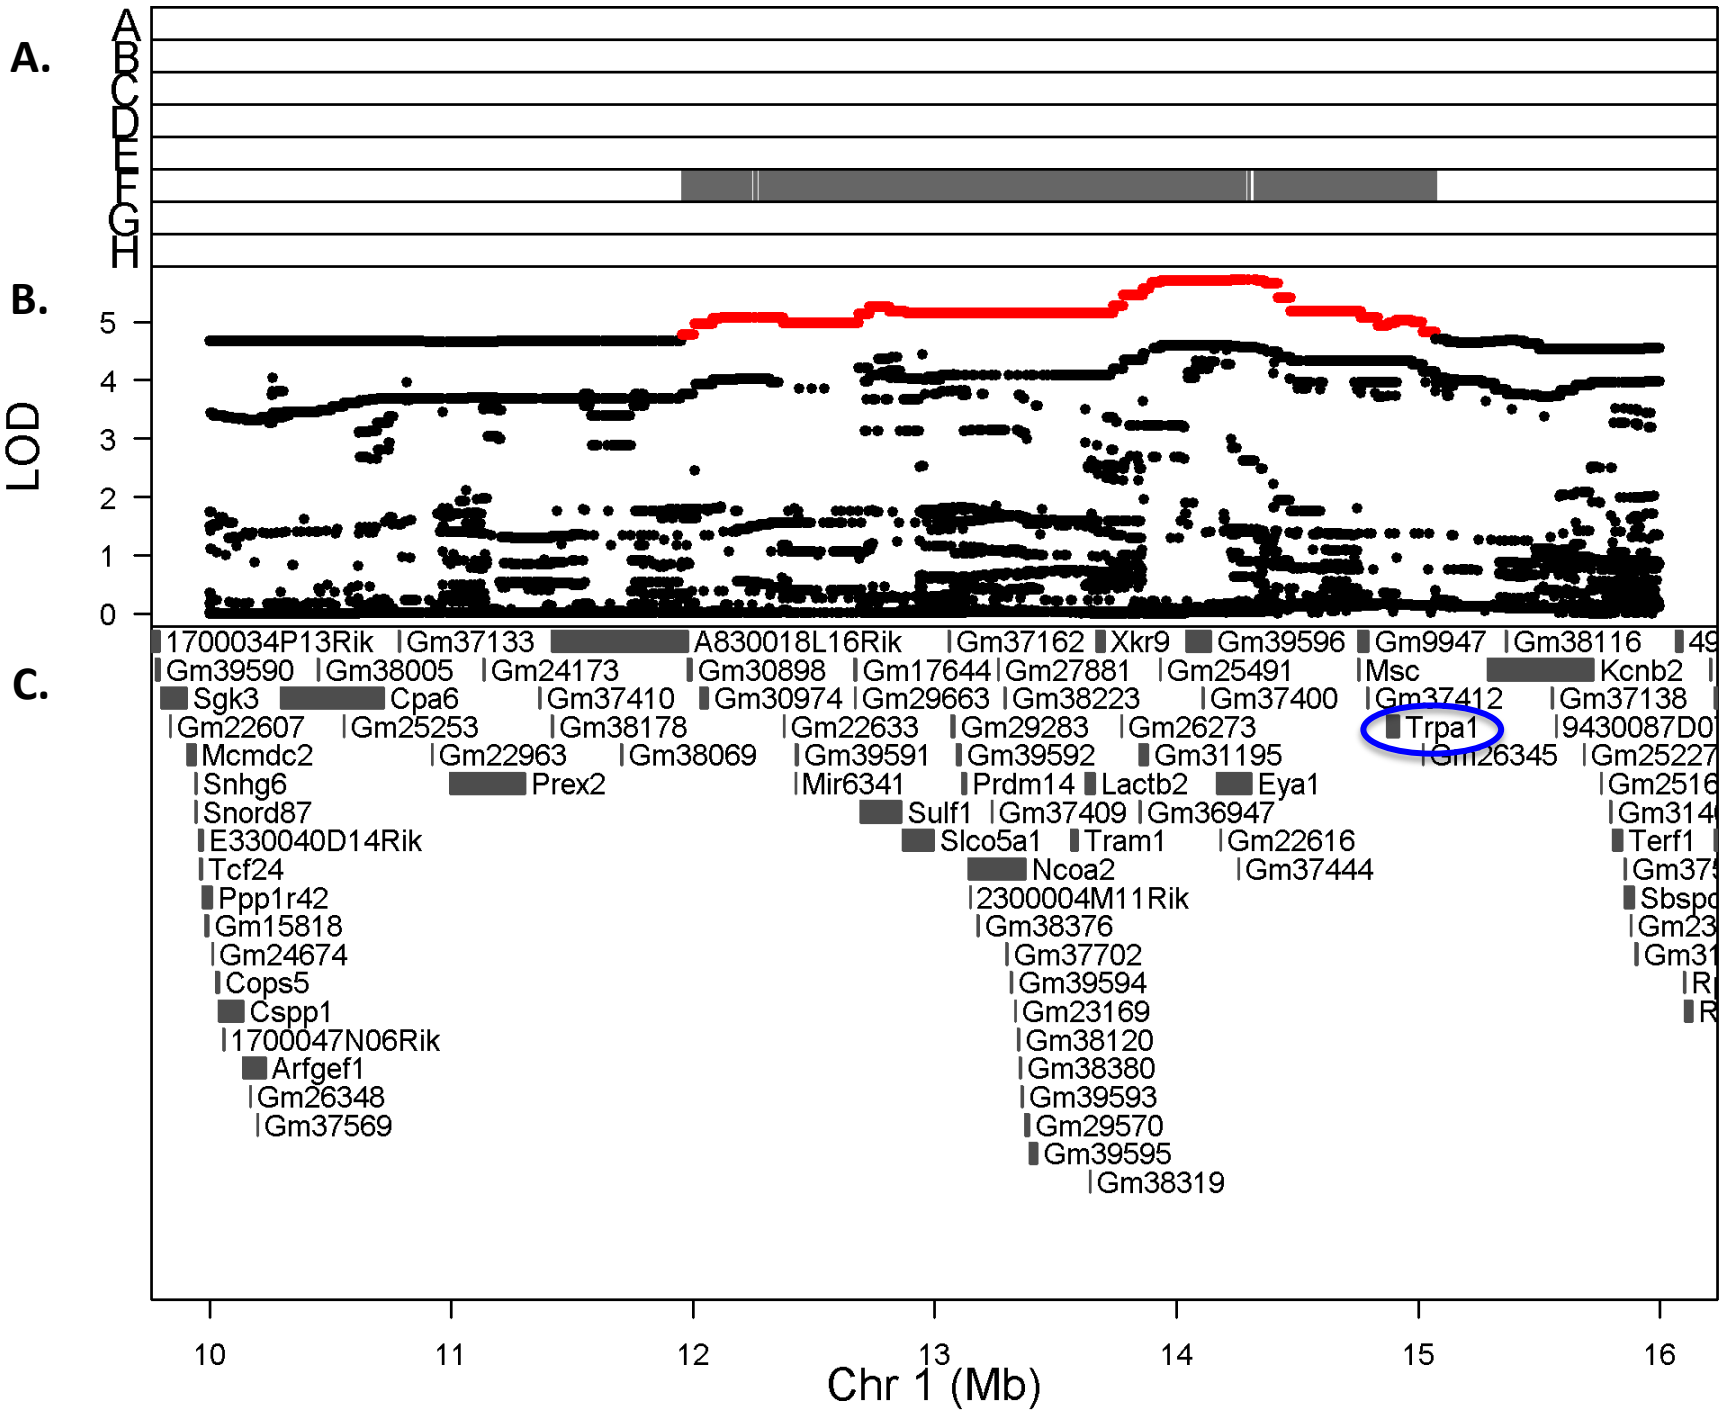



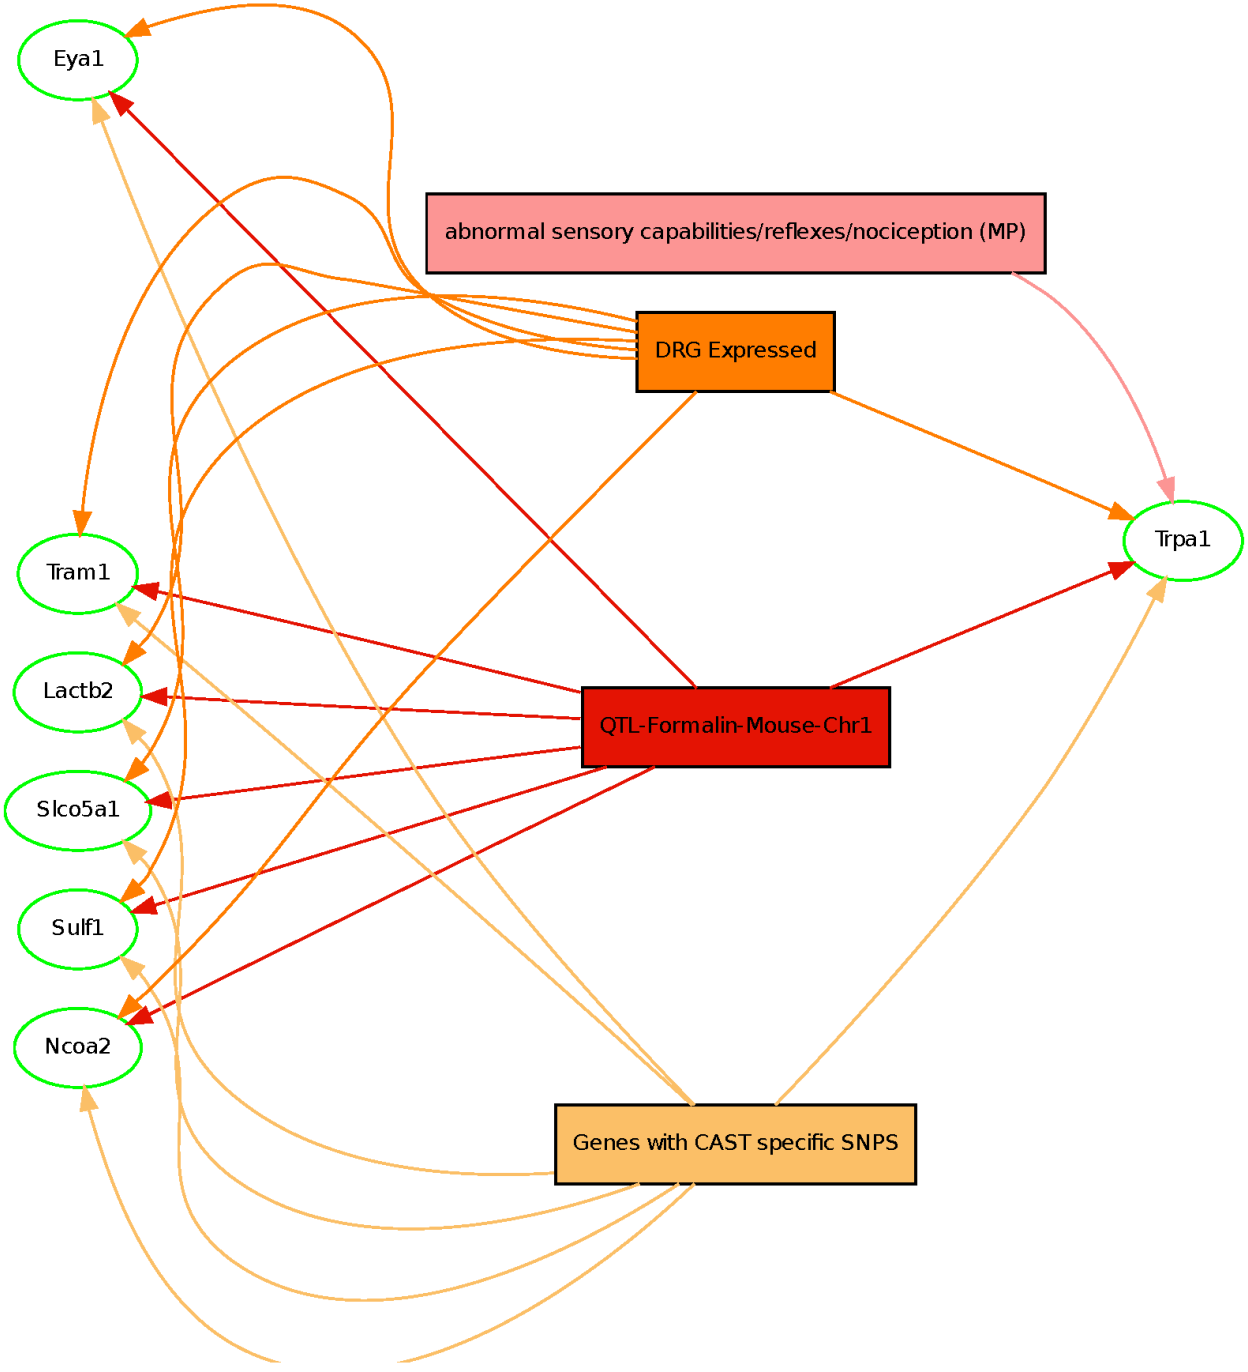



# C57BL/6J

# CAST/EiJ

I

TRPA1

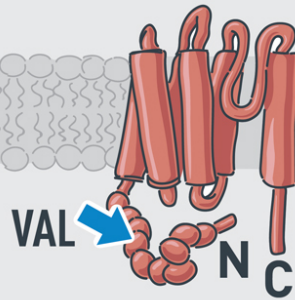

TRPA1

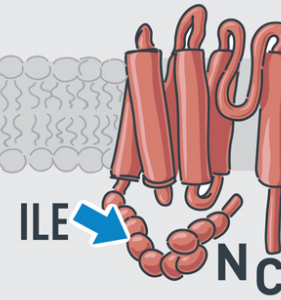

II

TRPV1

TRPA1

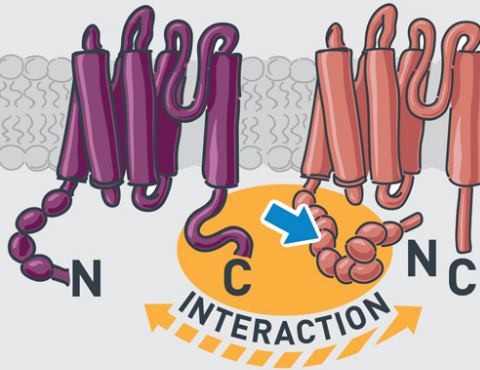

TRPV1

TRPA1

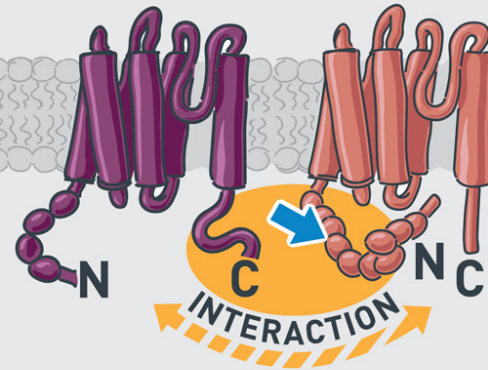

III

TRPA1a

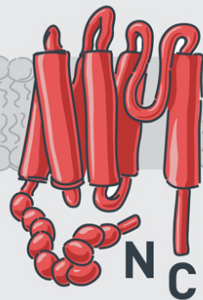

TRPA1a

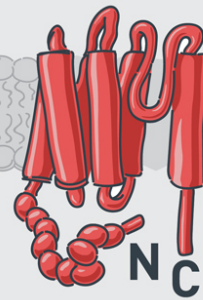

TRPA1a

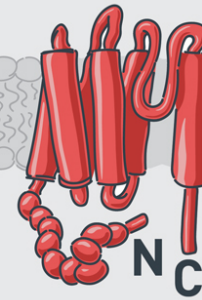

TRPA1a

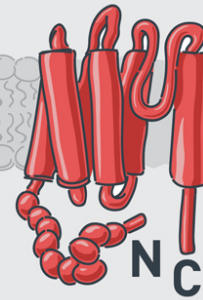

**A.**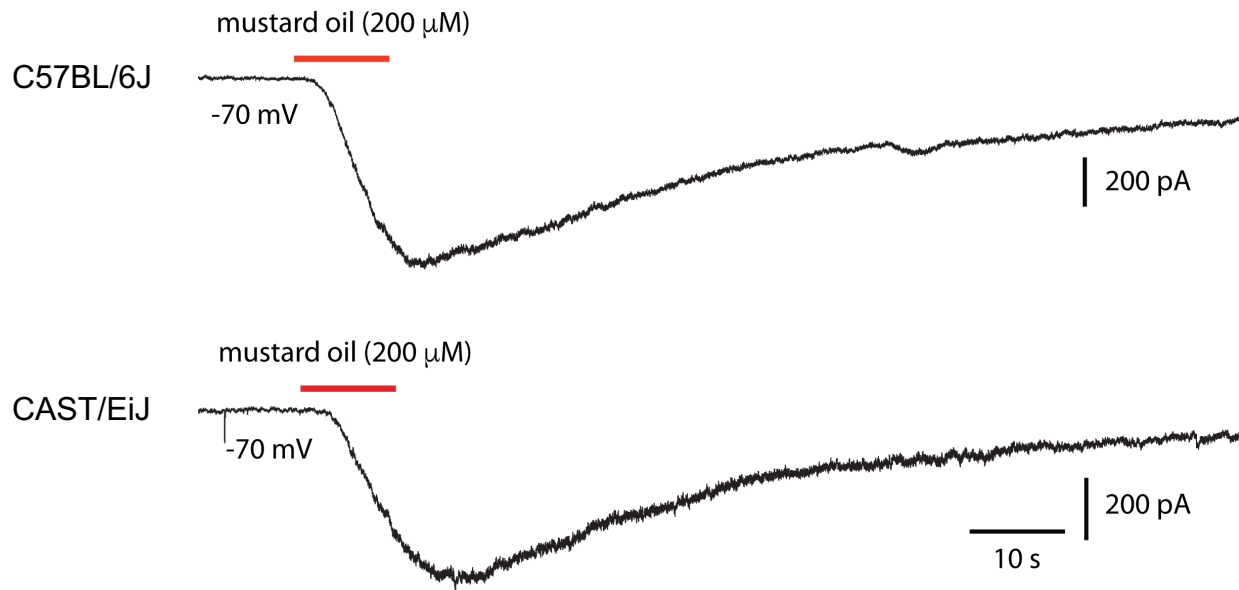**B.**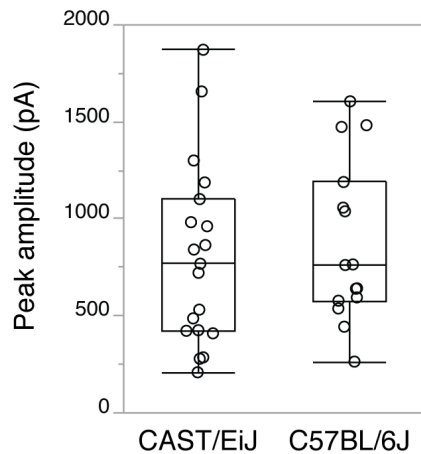**C.**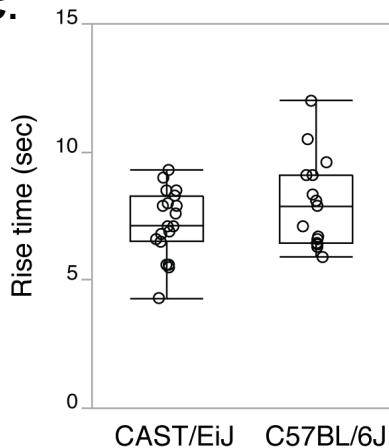**D.**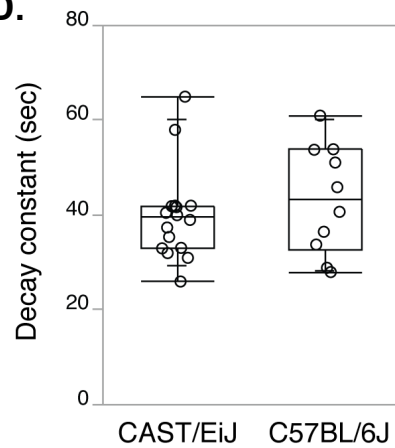

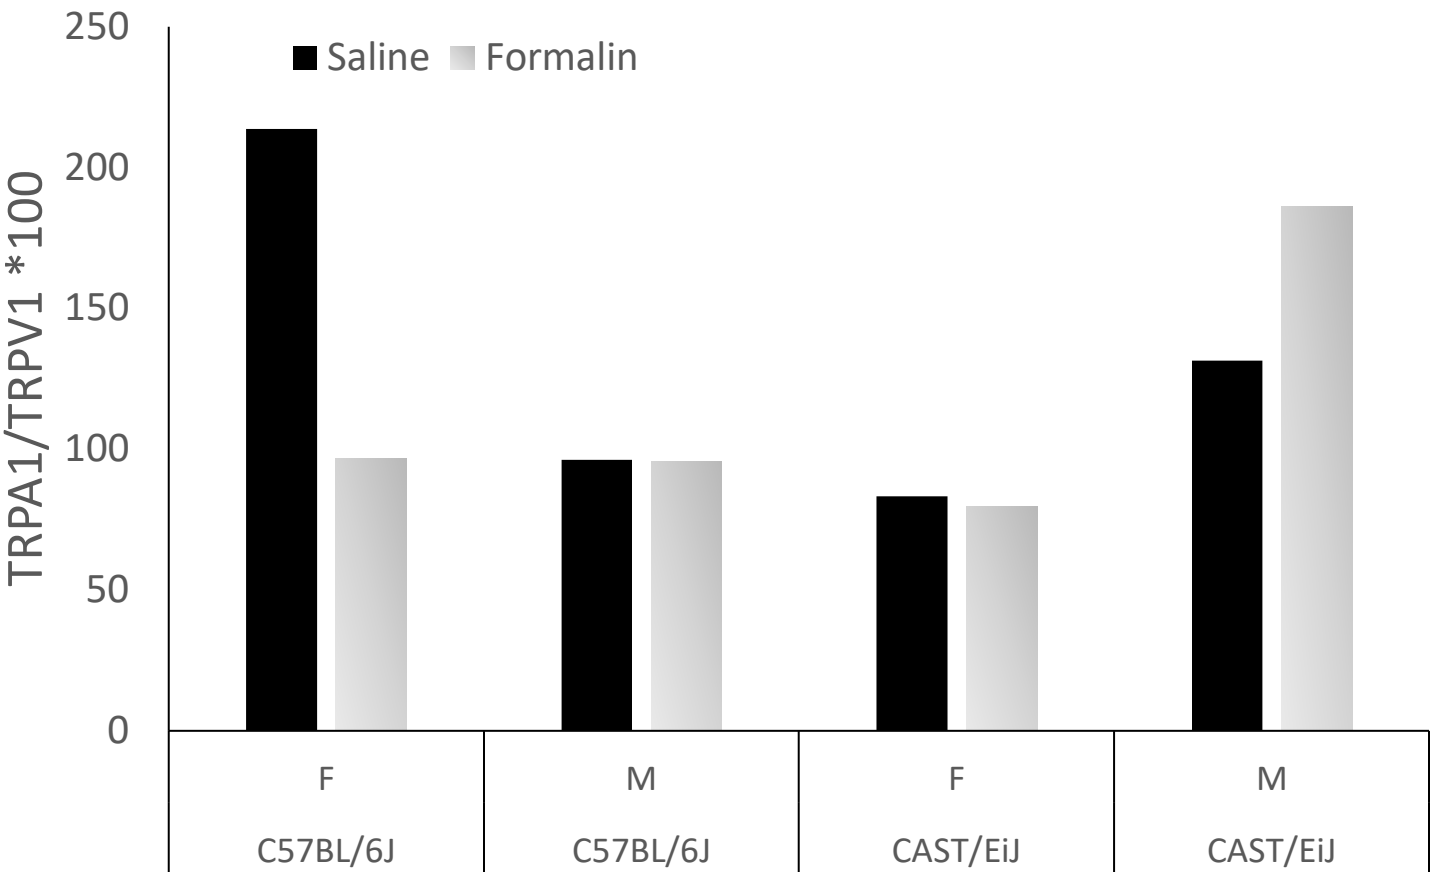

**Expression normalized to Gapdh and relative to B6 Trpa1a+b expression**

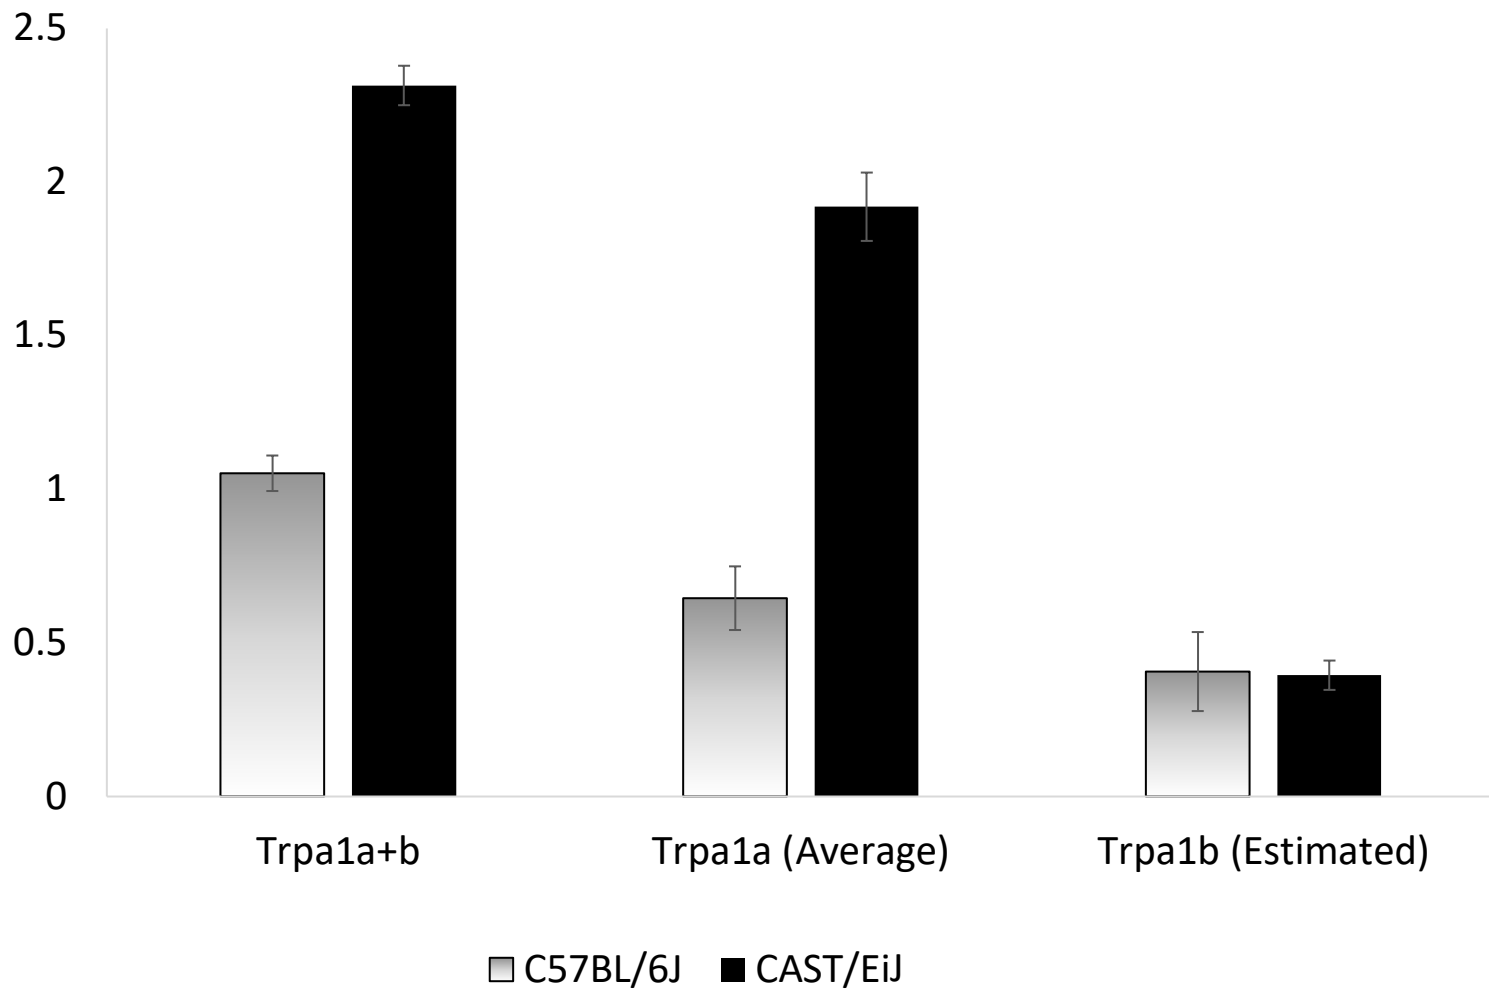

Source: https://www.biorxiv.org/content/10.1101/362855v1.full.pdf
